# Supplementary material
Source: publisher figshare collection journal article supplement (https://gsapubs.figshare.com/articles/dataset/_/22277230)
Supplement: Supplementary file 1 [file 1]

## Sheet: DFs_RateData
														Section ordinary least squares regression and standard error information
faultSection	faultNum	faultMaxLong	faultMinLong	site	lat	long	offset	offset1s	age	age1s	rate	rate1s	source	sectionRate	sectionRate1s	intercept	intercept1s	sectionRateMax	sectionRateMin	sectionRateSource
western Denali	1	-151.032	-155.211	DFRC	62.7909	-152.182	48	5	9.01784	1.76429	5.32278	1.09913	Haeussler, P.J., Matmon, A., Schwartz, D.P., and Seitz, G.G., 2017, Neotectonics of inte- rior Alaska and the late Quaternary slip rate along the Denali fault system: Geosphere, v. 13, no. 5, p. 1445–1463, doi:10.1130/GES01447.1.	5.32278	1.09913	--	--	6.42191	4.22365	Haeussler, P.J., Matmon, A., Schwartz, D.P., and Seitz, G.G., 2017, Neotectonics of inte- rior Alaska and the late Quaternary slip rate along the Denali fault system: Geosphere, v. 13, no. 5, p. 1445–1463, doi:10.1130/GES01447.1.
central Denali	2	-146.325	-151.032	Bull Creek	63.3936	-149.45	82	5	12.3	2	6.7	1.2	Meriaux, A.-S., K. Sieh, R. C. Finkel, C. M. Rubin, M. H. Taylor, A. J. Meltzner, and F. J. Ryerson (2009), Kinematic behavior of southern Alaska constrained by westward decreasing postglacial slip rates on the Denali Fault, Alaska, J. Geophys. Res., 114, B03404, doi:10.1029/2007JB005053.	7.6	2.1	1.3	22.1	9.7	5.5	This study
central Denali	2	-146.325	-151.032	DFBU	63.3985	-149.419	87	5	11.5104	1.32829	7.55837	0.897194	Haeussler, P.J., Matmon, A., Schwartz, D.P., and Seitz, G.G., 2017, Neotectonics of inte- rior Alaska and the late Quaternary slip rate along the Denali fault system: Geosphere, v. 13, no. 5, p. 1445–1463, doi:10.1130/GES01447.1.	7.6	2.1	1.3	22.1	9.7	5.5	This study
central Denali	2	-146.325	-151.032	DFCA	63.4031	-149.35	109	26	8.95019	0.987644	12.1785	2.03681	Haeussler, P.J., Matmon, A., Schwartz, D.P., and Seitz, G.G., 2017, Neotectonics of inte- rior Alaska and the late Quaternary slip rate along the Denali fault system: Geosphere, v. 13, no. 5, p. 1445–1463, doi:10.1130/GES01447.1.	7.6	2.1	1.3	22.1	9.7	5.5	This study
central Denali	2	-146.325	-151.032	DFSC	63.4629	-148.648	157	10	14.105	3.11824	11.1308	2.50588	Haeussler, P.J., Matmon, A., Schwartz, D.P., and Seitz, G.G., 2017, Neotectonics of inte- rior Alaska and the late Quaternary slip rate along the Denali fault system: Geosphere, v. 13, no. 5, p. 1445–1463, doi:10.1130/GES01447.1.	7.6	2.1	1.3	22.1	9.7	5.5	This study
central Denali	2	-146.325	-151.032	DFPP	63.4701	-148.426	57	14	14.1923	1.97598	4.01627	0.801467	Haeussler, P.J., Matmon, A., Schwartz, D.P., and Seitz, G.G., 2017, Neotectonics of inte- rior Alaska and the late Quaternary slip rate along the Denali fault system: Geosphere, v. 13, no. 5, p. 1445–1463, doi:10.1130/GES01447.1.	7.6	2.1	1.3	22.1	9.7	5.5	This study
central Denali	2	-146.325	-151.032	DFWC	63.4897	-148.084	25.5	4	2.61683	0.522375	9.74462	2.18501	Haeussler, P.J., Matmon, A., Schwartz, D.P., and Seitz, G.G., 2017, Neotectonics of inte- rior Alaska and the late Quaternary slip rate along the Denali fault system: Geosphere, v. 13, no. 5, p. 1445–1463, doi:10.1130/GES01447.1.	7.6	2.1	1.3	22.1	9.7	5.5	This study
central Denali	2	-146.325	-151.032	DFNR	63.5091	-147.632	100	10	12.9862	2.50957	7.70047	1.56511	Haeussler, P.J., Matmon, A., Schwartz, D.P., and Seitz, G.G., 2017, Neotectonics of inte- rior Alaska and the late Quaternary slip rate along the Denali fault system: Geosphere, v. 13, no. 5, p. 1445–1463, doi:10.1130/GES01447.1.	7.6	2.1	1.3	22.1	9.7	5.5	This study
central Denali	2	-146.325	-151.032	DFTH	63.528	-147.062	14	1	4.49616	3.12766	3.11377	2.18191	Haeussler, P.J., Matmon, A., Schwartz, D.P., and Seitz, G.G., 2017, Neotectonics of inte- rior Alaska and the late Quaternary slip rate along the Denali fault system: Geosphere, v. 13, no. 5, p. 1445–1463, doi:10.1130/GES01447.1.	7.6	2.1	1.3	22.1	9.7	5.5	This study
central Denali	2	-146.325	-151.032	ZERO	0	0	0	0	0	0	0	0	This study; unforced intercept represents zero age and zero offset	7.6	2.1	1.3	22.1	9.7	5.5	This study
eastern central Denali	3	-143.327	-146.325	DFCR	63.2104	-144.832	144	14	10.9839	1.26149	13.1101	1.6296	Haeussler, P.J., Matmon, A., Schwartz, D.P., and Seitz, G.G., 2017, Neotectonics of inte- rior Alaska and the late Quaternary slip rate along the Denali fault system: Geosphere, v. 13, no. 5, p. 1445–1463, doi:10.1130/GES01447.1.	13.2	0.7	0.01	7.3	13.9	12.5	This study
eastern central Denali	3	-143.327	-146.325	Slate Creek	63.2084	-144.825	166	25	12	2.1	13.8	3.2	Meriaux, A.-S., K. Sieh, R. C. Finkel, C. M. Rubin, M. H. Taylor, A. J. Meltzner, and F. J. Ryerson (2009), Kinematic behavior of southern Alaska constrained by westward decreasing postglacial slip rates on the Denali Fault, Alaska, J. Geophys. Res., 114, B03404, doi:10.1029/2007JB005053.	13.2	0.7	0.01	7.3	13.9	12.5	This study
eastern central Denali	3	-143.327	-146.325	DFMF	63.1541	-144.59	154	12	12.1979	1.79016	12.6251	1.92951	Haeussler, P.J., Matmon, A., Schwartz, D.P., and Seitz, G.G., 2017, Neotectonics of inte- rior Alaska and the late Quaternary slip rate along the Denali fault system: Geosphere, v. 13, no. 5, p. 1445–1463, doi:10.1130/GES01447.1.	13.2	0.7	0.01	7.3	13.9	12.5	This study
eastern central Denali	3	-143.327	-146.325	ZERO	0	0	0	0	0	0	0	0	This study; unforced intercept represents zero age and zero offset	13.2	0.7	0.01	7.3	13.9	12.5	This study
Totschunda	4	-142	-143.327	DFDP	62.6743	-143.156	64	7	11.1784	2.31618	5.72534	1.25479	Haeussler, P.J., Matmon, A., Schwartz, D.P., and Seitz, G.G., 2017, Neotectonics of inte- rior Alaska and the late Quaternary slip rate along the Denali fault system: Geosphere, v. 13, no. 5, p. 1445–1463, doi:10.1130/GES01447.1.	7.7	0.8	-1	8.4	8.5	6.9	This study
Totschunda	4	-142	-143.327	DFNM	62.6189	-143.032	80	14	10.7909	1.38184	7.41362	1.1764	Haeussler, P.J., Matmon, A., Schwartz, D.P., and Seitz, G.G., 2017, Neotectonics of inte- rior Alaska and the late Quaternary slip rate along the Denali fault system: Geosphere, v. 13, no. 5, p. 1445–1463, doi:10.1130/GES01447.1.	7.7	0.8	-1	8.4	8.5	6.9	This study
Totschunda	4	-142	-143.327	DFTC	62.5333	-142.852	149	14	18.3791	2.01859	8.10703	0.961972	Haeussler, P.J., Matmon, A., Schwartz, D.P., and Seitz, G.G., 2017, Neotectonics of inte- rior Alaska and the late Quaternary slip rate along the Denali fault system: Geosphere, v. 13, no. 5, p. 1445–1463, doi:10.1130/GES01447.1.	7.7	0.8	-1	8.4	8.5	6.9	This study
Totschunda	4	-142	-143.327	DFCM	62.2646	-142.521	11	1	1.29704	0.630684	8.48083	4.19387	Haeussler, P.J., Matmon, A., Schwartz, D.P., and Seitz, G.G., 2017, Neotectonics of inte- rior Alaska and the late Quaternary slip rate along the Denali fault system: Geosphere, v. 13, no. 5, p. 1445–1463, doi:10.1130/GES01447.1.	7.7	0.8	-1	8.4	8.5	6.9	This study
Totschunda	4	-142	-143.327	DFNC	62.248	-142.503	68	5	7.66847	1.66377	8.86747	1.97185	Haeussler, P.J., Matmon, A., Schwartz, D.P., and Seitz, G.G., 2017, Neotectonics of inte- rior Alaska and the late Quaternary slip rate along the Denali fault system: Geosphere, v. 13, no. 5, p. 1445–1463, doi:10.1130/GES01447.1.	7.7	0.8	-1	8.4	8.5	6.9	This study
Totschunda	4	-142	-143.327	ZERO	0	0	0	0	0	0	0	0	This study; unforced intercept represents zero age and zero offset	7.7	0.8	-1	8.4	8.5	6.9	This study
Eastern Denali	5	-142	-143.327	DFTR	62.6752	-142.807	115	25	14.4777	3.09657	7.94327	2.07434	Haeussler, P.J., Matmon, A., Schwartz, D.P., and Seitz, G.G., 2017, Neotectonics of inte- rior Alaska and the late Quaternary slip rate along the Denali fault system: Geosphere, v. 13, no. 5, p. 1445–1463, doi:10.1130/GES01447.1.	7.94327	2.07434	--	--	10.0176	5.86892	Haeussler, P.J., Matmon, A., Schwartz, D.P., and Seitz, G.G., 2017, Neotectonics of inte- rior Alaska and the late Quaternary slip rate along the Denali fault system: Geosphere, v. 13, no. 5, p. 1445–1463, doi:10.1130/GES01447.1.

## Sheet: DFs_RateResidualSections
id	fault	faultNum	sectionLong	ols_sectionRate	ols_sectionRate1s	ols_sectionRateMax	ols_sectionRateMin	YAKres	YAKres1s	YAKresMax	YAKresMin	sectionRateSource
1	western Denali	1	-155.211	5.32	1.1	6.42	4.22	2.28	2.37	4.65	-0.09	Haeussler, P.J., Matmon, A., Schwartz, D.P., and Seitz, G.G., 2017, Neotectonics of inte- rior Alaska and the late Quaternary slip rate along the Denali fault system: Geosphere, v. 13, no. 5, p. 1445–1463, doi:10.1130/GES01447.1.
2	western Denali	1	-151.032	5.32	1.1	6.42	4.22	2.28	2.37	4.65	-0.09	Haeussler, P.J., Matmon, A., Schwartz, D.P., and Seitz, G.G., 2017, Neotectonics of inte- rior Alaska and the late Quaternary slip rate along the Denali fault system: Geosphere, v. 13, no. 5, p. 1445–1463, doi:10.1130/GES01447.1.
3	central Denali	2	-151.032	7.6	2.1	9.7	5.5	5.6	2.21	7.81	3.39	This study
4	central Denali	2	-146.325	7.6	2.1	9.7	5.5	5.6	2.21	7.81	3.39	This study
5	eastern central Denali	3	-146.325	13.2	0.7	13.9	12.5	2.44	2.33	4.77	0.11	This study
6	eastern central Denali	3	-143.327	13.2	0.7	13.9	12.5	2.44	2.33	4.77	0.11	This study
7	Totschunda plus EDF	9	-143.327	15.64	2.22	17.87	13.42	0	0	0	0	This study
8	Totschunda plus EDF	9	-142	15.64	2.22	17.87	13.42	0	0	0	0	This study
9	Totschunda	4	-143.327	7.7	0.8	8.5	6.9	7.94	2.36	10.31	5.58	This study
10	Totschunda	4	-142	7.7	0.8	8.5	6.9	7.94	2.36	10.31	5.58	This study
11	Eastern Denali	5	-143.327	7.94	2.07	10.02	5.87	7.7	3.04	10.74	4.66	Haeussler, P.J., Matmon, A., Schwartz, D.P., and Seitz, G.G., 2017, Neotectonics of inte- rior Alaska and the late Quaternary slip rate along the Denali fault system: Geosphere, v. 13, no. 5, p. 1445–1463, doi:10.1130/GES01447.1.
12	Eastern Denali	5	-142	7.94	2.07	10.02	5.87	7.7	3.04	10.74	4.66	Haeussler, P.J., Matmon, A., Schwartz, D.P., and Seitz, G.G., 2017, Neotectonics of inte- rior Alaska and the late Quaternary slip rate along the Denali fault system: Geosphere, v. 13, no. 5, p. 1445–1463, doi:10.1130/GES01447.1.

## Sheet: 1947MMI
MMI data from: Brockman, S. R., Espinosa, A. F., & Michael, J. A. (1988). Catalog of intensities and magnitudes for earthquakes in Alaska and the Aleutian Islands, 1786-1981 (No. 1840). US Government Printing Office.
long	lat	locale	mmi
-149.093	64.5639	Nenana	8
-147.71	64.85	Fairbanks	8
-148.9	64.7	Berg	7
-149.16	64.33	Clear	7
-149.16	63.73	McKinley_Park	7
-147.95	64.83	Ester_Creek	6
-149.11	64.01	Ferry	6
-149.01	63.83	Healy_Fork	6
-144.9	65.57	Central	6
-150.3	65.48	Rampart	5
-150.16	62.55	Blair_Lake	5
-142.53	63.08	Tetlin	5
-155.67	62.97	McGrath	5
-147.63	64.81	Ladd_Air_Force_Base	4
-145.85	64.16	Big_Delta	4
-143.5	63.35	Tanacross	4
-142	64.07	Chicken	4
-149.89	61.21	Anchorage	4
-146.83	64.41	Harding_Lake	3
-147.5	66.37	Beaver	3
-145.38	62.26	Gulkana	3
-150.1	67.41	Wiseman	3
-141.92	62.97	Northway	3
-157.83	64.88	Koyukuk	3
-145.75	60.55	Cordova	3

## Sheet: 1947epicenter
Hypocenter location data credit: Bondár, I., Engdahl, E. R., Villaseñor, A., Harris, J., & Storchak, D. (2015). ISC-GEM: Global instrumental earthquake catalogue (1900–2009), II. Location and seismicity patterns. Physics of the Earth and Planetary Interiors, 239, 2-13. doi: 10.1016/j.pepi.2014.06.002. Accessed 12 August 2022 from: http://www.isc.ac.uk/iscgem/download.php
date	lat	lon	mw	unc	eventid
1947-10-16 02:09:50.78	64.064	-148.569	7.07	0.3	898078
1947-10-20 01:43:20.95	64.119	-148.702	6.44	0.37	898087

## Sheet: EF20_GPSvelocity
GPS velocity solutions from: Elliott, J., & Freymueller, J. T. (2020). A block model of present‐day kinematics of Alaska and western Canada. Journal ofGeophysical Research: Solid Earth, 125, e2019JB018378. https://do10.1130/ 10.1029/2019JB018378 Northern Foothills thrust-perpendicular (NFt) velocity calculated in this study based azimuth perpendicular to NFt strike (N 8.5 degrees W).
long	lat	Veast_mmyr	Vnorth_mmyr	Veast_sigma_mmyr	Vnorth_sigma_mmyr	swathDist_m	V_NFtPerp_mmyr	V_NFtPerp_sigma_mmyr	siteName
-147.855	63.2652	-7.435	6.269	0.99	0.92	131472	6.33862	0.930218	DH97
-149.211	63.2847	-5.774	5.003	0.67	0.69	117967	5.05856	0.697663	PISA
-148.187	63.3055	-7.246	3.96	1.63	1.15	124389	4.00398	1.16277	M110
-149.09	63.3413	-4.042	5.321	0.79	0.77	112829	5.3801	0.778552	SSWB
-148.647	63.3953	-5.632	3.537	0.72	0.7	110716	3.57628	0.707774	R109
-148.804	63.512	-4.515	-0.133	1.45	1.23	96570.4	-0.134477	1.24366	SLIM
-148.809	63.5515	-1.321	2.44	3.31	2.28	92191.1	2.4671	2.30532	CARL
-148.779	63.4588	-3.54	4.729	0.57	0.62	102624	4.78152	0.626886	HIWA
-148.82	63.4837	-4.704	5.618	0.72	0.67	99540.9	5.68039	0.677441	PANA
-148.833	63.6524	-3.479	4.49	1.4	1.31	80909.4	4.53987	1.32455	GRIZ
-148.92	63.7936	-3.154	4.164	1.01	0.88	64668.7	4.21025	0.889773	DFLY
-148.978	63.8358	-1.242	4.942	0.53	0.61	59541.6	4.99689	0.616775	GRNR
-149.295	64.1707	-1.502	1.127	1.25	0.84	20067.3	1.13952	0.849329	BRWN
-149.08	64.5794	-1.982	0.476	1.44	1.26	-2234	0.481287	1.27399	NENA
						average	4.84178	0.827085
						gradient	4.3605	2.10108

## Sheet: TotatlanikaRiverProfile
Totatlanika River location, elevation, and drainage area data extracted from the Alaska IfSAR DEM (available by searching https://earthexplorer.usgs.gov/) using the Topoographic Analysis Kit in MATLAB 2017b (Forte, A. M. and Whipple, K. X.: Short communication: The Topographic Analysis Kit (TAK) for TopoToolbox, Earth Surf. Dynam., 7, 87–95, https://doi.org/10.5194/esurf-7-87-2019, 2019; Schwangh…
fig3_profileDist_m	long	lat	elev_m	area_m
3.68268	-148.785	64.3937	154	27649674
7.69301	-148.784	64.3936	153.89	27649673
11.9894	-148.784	64.3936	153.89	27649673
16.9366	-148.784	64.3936	154	27649647
21.8839	-148.784	64.3935	154.07	27649614
26.5452	-148.784	64.3935	154.19	27649599
30.5555	-148.784	64.3935	154.21	27649593
35.4007	-148.784	64.3934	154.3	27649585
40.348	-148.784	64.3934	154.29	27649584
45.2952	-148.784	64.3933	154.25	27649550
50.2425	-148.784	64.3933	154.21	27649534
55.1898	-148.784	64.3932	154.21	27649520
60.1371	-148.784	64.3932	154.21	27649356
65.0844	-148.784	64.3931	154.23	27649352
68.2842	-148.784	64.3931	154.26	27649295
71.2704	-148.784	64.3931	154.26	27649295
74.3793	-148.784	64.393	154.29	27649293
79.3266	-148.784	64.393	154.46	27649291
84.2739	-148.784	64.3929	154.47	27649290
89.0984	-148.784	64.3929	154.45	27648764
92.0846	-148.785	64.3929	154.38	27648759
96.3423	-148.785	64.3928	154.39	27648749
100.018	-148.785	64.3928	154.39	27648749
103.463	-148.785	64.3928	154.35	27648744
108.191	-148.785	64.3927	154.56	27648743
112.202	-148.785	64.3927	154.72	27648738
116.212	-148.784	64.3927	154.7	27648735
120.602	-148.784	64.3926	154.7	27648735
125.55	-148.784	64.3926	154.54	27648677
130.497	-148.784	64.3925	154.31	27648631
135.444	-148.784	64.3925	154.12	27648611
140.392	-148.784	64.3924	154.01	27648571
145.339	-148.784	64.3924	154.01	27601977
150.286	-148.784	64.3923	154.15	27601963
154.438	-148.784	64.3923	154.32	27601956
157.424	-148.785	64.3923	154.34	27601935
162.355	-148.785	64.3922	154.36	27601888
167.302	-148.785	64.3922	154.4	27601860
172.249	-148.785	64.3921	154.41	27601834
176.267	-148.784	64.3921	154.42	27601832
180.278	-148.784	64.3921	154.42	27601832
184.288	-148.784	64.3921	154.35	27601818
188.298	-148.784	64.392	154.28	27601817
193.01	-148.784	64.392	154.33	27601796
197.256	-148.784	64.3919	154.29	27601778
201.266	-148.784	64.3919	154.29	27601778
205.277	-148.784	64.3919	154.22	27601777
210.149	-148.784	64.3918	154.24	27601755
214.234	-148.784	64.3918	154.3	27601709
218.245	-148.784	64.3918	154.3	27601709
222.255	-148.784	64.3917	154.43	27601708
226.265	-148.784	64.3917	154.42	27601707
230.276	-148.784	64.3917	154.42	27601707
234.286	-148.784	64.3917	154.58	27601706
238.296	-148.783	64.3916	154.71	27601705
242.307	-148.783	64.3916	154.68	27601700
246.725	-148.783	64.3916	154.68	27601700
251.672	-148.783	64.3915	154.57	27601652
256.211	-148.783	64.3915	154.58	27601622
260.222	-148.783	64.3914	154.31	27601617
264.232	-148.783	64.3914	154.22	27601614
268.811	-148.783	64.3914	154.34	27601600
272.568	-148.783	64.3913	154.34	27601600
275.932	-148.783	64.3913	154.7	27601596
280.699	-148.783	64.3913	154.8	27601381
284.709	-148.783	64.3912	154.75	27601374
288.72	-148.783	64.3912	154.21	27601016
293.071	-148.783	64.3912	154.21	27601016
298.018	-148.783	64.3911	154.23	27601008
302.625	-148.783	64.3911	154.41	27600871
306.635	-148.783	64.391	154.6	27600849
311.535	-148.783	64.391	154.75	27600848
315.592	-148.783	64.391	154.77	27600843
320.105	-148.783	64.3909	154.69	27600821
325.052	-148.783	64.3909	154.63	27600819
329.999	-148.783	64.3908	154.68	27600803
334.445	-148.783	64.3908	154.68	27600803
338.569	-148.783	64.3908	154.75	27600791
343.402	-148.783	64.3907	154.84	27600767
347.413	-148.783	64.3907	154.94	27600755
351.423	-148.782	64.3907	155.08	27600748
355.433	-148.782	64.3906	155.08	27600748
359.444	-148.782	64.3906	155.18	27600726
363.454	-148.782	64.3906	155.22	27600720
367.464	-148.782	64.3905	155.22	27600720
371.522	-148.782	64.3905	155.15	27600708
376.422	-148.782	64.3905	155.13	27600430
380.432	-148.782	64.3904	154.81	27600378
384.443	-148.782	64.3904	154.81	27600378
388.453	-148.782	64.3904	154.66	27600366
392.463	-148.782	64.3903	154.45	27600353
397.23	-148.782	64.3903	154.58	27600301
401.421	-148.782	64.3903	154.66	27600293
405.8	-148.782	64.3902	154.66	27600293
410.747	-148.782	64.3902	154.86	27600278
415.326	-148.782	64.3901	154.99	27600256
419.336	-148.782	64.3901	154.98	27600226
423.346	-148.782	64.3901	154.85	27600225
427.357	-148.781	64.3901	154.85	27600225
431.367	-148.781	64.39	154.68	27600221
435.377	-148.781	64.39	154.67	27600203
440.078	-148.781	64.3899	154.86	27600187
445.025	-148.781	64.3899	155	27600180
449.972	-148.781	64.3899	155.11	27600163
454.229	-148.781	64.3898	155.19	27600157
458.24	-148.781	64.3898	155.19	27600157
462.25	-148.781	64.3898	155.25	27600147
467.112	-148.781	64.3897	155.24	27600140
472.059	-148.781	64.3897	155.21	27600128
477.006	-148.781	64.3896	155.15	27600100
481.102	-148.781	64.3896	154.76	27600072
485.576	-148.781	64.3896	154.76	27600072
490.523	-148.781	64.3895	154.66	27600043
495.47	-148.781	64.3895	154.66	27600026
500.417	-148.781	64.3894	154.69	27600010
505.365	-148.781	64.3894	154.79	27599995
509.849	-148.781	64.3893	154.93	27599993
513.934	-148.781	64.3893	155	27599979
518.881	-148.781	64.3893	155.19	27599958
523.829	-148.781	64.3892	155.3	27599952
528.619	-148.781	64.3892	155.28	27599947
531.606	-148.781	64.3891	155.16	27599933
535.897	-148.781	64.3891	155.06	27599826
540.844	-148.781	64.3891	155.04	27599801
545.792	-148.781	64.389	155.06	27599787
550.739	-148.781	64.389	155.1	27599767
555.686	-148.781	64.3889	155.15	27599758
560.634	-148.781	64.3889	155.24	27599756
564.957	-148.781	64.3888	155.24	27599756
568.967	-148.781	64.3888	155.29	27599747
572.978	-148.781	64.3888	155.31	27599744
577.773	-148.781	64.3887	155.25	27597807
581.078	-148.781	64.3887	155.27	27597806
584.894	-148.781	64.3887	155.27	27597806
589.841	-148.781	64.3886	155.32	27597797
594.788	-148.781	64.3886	155.38	27597781
598.906	-148.781	64.3885	155.38	27597763
601.901	-148.781	64.3885	155.33	27597696
605.911	-148.781	64.3885	155.3	27597666
610.479	-148.781	64.3884	155.31	27597662
614.869	-148.781	64.3884	155.31	27597662
618.879	-148.781	64.3884	155.32	27597628
622.89	-148.781	64.3883	155.36	27597627
627.618	-148.781	64.3883	155.39	27597624
631.063	-148.781	64.3883	155.41	27597622
634.409	-148.781	64.3882	155.41	27597622
638.42	-148.781	64.3882	155.4	27597602
643.309	-148.781	64.3882	155.37	27597575
648.256	-148.781	64.3881	155.42	27597568
652.325	-148.78	64.3881	155.61	27597544
656.335	-148.78	64.388	155.61	27597544
660.345	-148.78	64.388	155.66	27597543
664.356	-148.78	64.388	155.67	27597537
669.017	-148.78	64.3879	155.67	27597530
672.601	-148.78	64.3879	155.67	27597530
676.138	-148.78	64.3879	155.6	27597520
681.086	-148.78	64.3878	155.45	27597464
686.033	-148.78	64.3878	155.3	27597450
690.98	-148.78	64.3877	155.26	27597435
695.664	-148.78	64.3877	155.34	27597428
699.675	-148.78	64.3877	155.16	27597418
704.497	-148.78	64.3876	155.27	27597406
708.632	-148.78	64.3876	155.32	27597378
713.066	-148.78	64.3876	155.32	27597378
718.014	-148.78	64.3875	155.35	27597358
722.961	-148.78	64.3875	155.3	27597345
727.908	-148.78	64.3874	155.29	27597315
732.856	-148.78	64.3874	155.18	27596880
737.803	-148.78	64.3873	155.17	27596869
742.326	-148.78	64.3873	155.28	27596842
746.372	-148.78	64.3873	155.28	27596830
751.32	-148.78	64.3872	155.39	27596774
756.231	-148.78	64.3872	155.55	27596765
760.241	-148.78	64.3871	155.61	27596756
764.252	-148.78	64.3871	155.61	27596756
768.459	-148.78	64.3871	155.62	27596754
773.406	-148.78	64.387	155.69	27596741
778.353	-148.78	64.387	155.77	27596728
783.3	-148.78	64.3869	155.92	27596710
788.248	-148.78	64.3869	156.02	27596697
793.195	-148.78	64.3869	156.01	27596696
798.142	-148.78	64.3868	155.94	27596678
803.09	-148.78	64.3868	155.85	27596634
808.037	-148.78	64.3867	155.78	27596621
812.984	-148.78	64.3867	155.76	27596581
817.931	-148.78	64.3866	155.81	27596579
822.879	-148.78	64.3866	155.78	27596561
827.629	-148.78	64.3865	155.92	27596550
831.64	-148.78	64.3865	155.95	27596545
835.65	-148.78	64.3865	156.09	27596522
840.018	-148.779	64.3864	156.09	27596522
844.965	-148.779	64.3864	156.17	27596516
849.555	-148.779	64.3864	156.27	27596508
853.565	-148.779	64.3863	156.32	27596496
857.576	-148.779	64.3863	156.25	27596487
861.02	-148.779	64.3863	156.25	27596487
864.278	-148.779	64.3862	156.13	27596339
869.225	-148.779	64.3862	156.22	27594545
874.042	-148.779	64.3861	156.44	27594544
878.053	-148.779	64.3861	156.55	27594538
882.063	-148.779	64.3861	156.5	27594532
886.364	-148.779	64.386	156.5	27594532
891.311	-148.779	64.386	156.22	27594523
896.259	-148.779	64.386	155.98	27594506
900.915	-148.779	64.3859	155.98	27594474
904.926	-148.779	64.3859	155.86	27594466
909.776	-148.779	64.3858	155.84	27594402
914.723	-148.779	64.3858	156.05	27594392
918.83	-148.779	64.3858	155.93	27594380
922.841	-148.779	64.3857	155.93	27594380
926.851	-148.779	64.3857	156.01	27593963
930.861	-148.779	64.3857	156.04	27593962
934.872	-148.779	64.3856	156.04	27593962
938.882	-148.779	64.3856	156.17	27593937
942.892	-148.778	64.3856	156.27	27593936
946.903	-148.778	64.3855	156.29	27593935
950.913	-148.778	64.3855	156.29	27593935
954.923	-148.778	64.3855	156.48	27593934
958.934	-148.778	64.3855	156.7	27593929
962.944	-148.778	64.3854	156.7	27593929
966.402	-148.778	64.3854	156.65	27593927
967.126	-148.778	64.3854	156.57	27593910
967.85	-148.778	64.3854	156.56	27593870
969.127	-148.778	64.3854	156.63	27593857
973.137	-148.778	64.3854	156.47	27593811
974.67	-148.778	64.3854	156.51	27593676
977.872	-148.777	64.3853	156.28	27593671
981.882	-148.777	64.3853	156.28	27593671
985.893	-148.777	64.3853	155.97	27593667
986.861	-148.777	64.3853	156	27591453
989.882	-148.777	64.3853	155.25	27591379
990.627	-148.777	64.3852	155.84	27591447
990.926	-148.777	64.3853	155.5	27591341
992.508	-148.777	64.3852	155.41	27591399
992.957	-148.777	64.3852	155.49	27591432
993.681	-148.777	64.3852	155.41	27591399
994.936	-148.777	64.3852	155.96	27591212
998.946	-148.777	64.3852	155.96	27591212
1002.96	-148.776	64.3852	155.99	27591211
1006.97	-148.776	64.3852	156.05	27591210
1010.98	-148.776	64.3851	156.1	27591209
1013.54	-148.776	64.3851	156.1	27591209
1014.27	-148.776	64.3851	156.07	27591204
1014.99	-148.776	64.3851	156.04	27591200
1015.71	-148.776	64.3851	156.18	27591178
1016.44	-148.776	64.3851	156.36	27591167
1017.16	-148.776	64.3851	156.43	27591153
1017.89	-148.776	64.3851	156.39	27591137
1018.61	-148.776	64.3851	156.28	27591093
1019.33	-148.775	64.3851	156.18	27591083
1021.51	-148.775	64.3851	156.14	27591036
1025.52	-148.775	64.3851	155.85	27591020
1029.18	-148.775	64.3851	156.46	27590748
1029.53	-148.775	64.385	155.85	27591018
1029.9	-148.775	64.3851	156.71	27590747
1031.27	-148.774	64.3851	156.99	27590743
1031.43	-148.775	64.3851	156.33	27590753
1031.53	-148.775	64.385	155.98	27590805
1032.25	-148.775	64.385	156.14	27590782
1032.97	-148.775	64.385	156.33	27590753
1033.59	-148.773	64.3851	156.93	27590554
1034.73	-148.773	64.3851	157.11	27590550
1035.28	-148.774	64.385	157.1	27590740
1035.94	-148.774	64.3851	156.69	27590600
1036.11	-148.773	64.3851	156.81	27590563
1036.67	-148.774	64.3851	156.7	27590584
1036.72	-148.774	64.385	157.08	27590731
1036.92	-148.774	64.3851	156.8	27590637
1037.39	-148.774	64.3851	156.81	27590563
1038.06	-148.773	64.3851	156.49	27590423
1038.46	-148.774	64.385	157.03	27590663
1038.74	-148.773	64.3851	157.08	27590536
1038.78	-148.773	64.3852	156.22	27590402
1039.02	-148.774	64.385	156.96	27590660
1039.74	-148.774	64.385	157.01	27590647
1039.94	-148.773	64.3851	156.49	27590423
1040.02	-148.774	64.385	157.06	27590719
1040.41	-148.773	64.3851	156.8	27590522
1040.49	-148.773	64.3851	156.09	27590293
1041.14	-148.773	64.3851	156.61	27590474
1041.45	-148.774	64.385	157.06	27590719
1041.86	-148.773	64.3851	156.64	27590437
1044.5	-148.772	64.3851	156.31	27590268
1048.51	-148.772	64.3851	156.97	27590267
1052.52	-148.772	64.385	156.97	27590267
1055.45	-148.772	64.3851	156.77	27590080
1056.05	-148.772	64.3851	156.83	27590168
1056.17	-148.772	64.3851	156.62	27590075
1056.35	-148.772	64.385	157.24	27590262
1056.89	-148.771	64.3851	156.34	27590023
1057.07	-148.772	64.385	157.38	27590233
1057.8	-148.772	64.385	157.36	27590232
1058.52	-148.772	64.385	157.28	27590206
1059.04	-148.772	64.385	157.17	27590186
1059.73	-148.771	64.3851	156.34	27590023
1063.74	-148.771	64.385	155.96	27590000
1067.46	-148.771	64.385	156.57	27589889
1067.75	-148.771	64.385	155.41	27589999
1068.97	-148.771	64.385	156.57	27589889
1069.09	-148.771	64.385	155.61	27589980
1069.49	-148.771	64.385	156.87	27589877
1069.81	-148.771	64.385	156.13	27589948
1070.53	-148.771	64.385	156.44	27589932
1071.26	-148.771	64.385	156.54	27589899
1073.5	-148.77	64.385	157.28	27589870
1074.28	-148.77	64.385	157.66	27589869
1078.24	-148.77	64.385	157.73	27589867
1082.78	-148.77	64.3849	157.86	27589113
1087.73	-148.77	64.3849	157.99	27589112
1092.68	-148.77	64.3848	158.09	27589109
1097.62	-148.77	64.3848	158.18	27589107
1102.04	-148.77	64.3848	158.18	27589107
1106.19	-148.77	64.3847	158.2	27589103
1111.14	-148.77	64.3847	158.2	27589100
1115.94	-148.77	64.3846	158.24	27589084
1119.95	-148.77	64.3846	158.24	27589081
1124.66	-148.77	64.3846	158.24	27589076
1129.61	-148.77	64.3845	158.1	27588581
1133.1	-148.77	64.3845	157.56	27588528
1136.42	-148.77	64.3845	157.56	27588528
1140.43	-148.77	64.3844	157.7	27588474
1144.44	-148.77	64.3844	158.24	27588473
1148.92	-148.77	64.3844	158.24	27588473
1153.4	-148.77	64.3843	158.43	27588470
1157.49	-148.77	64.3843	158.43	27588462
1162.36	-148.77	64.3842	158.38	27588425
1166.37	-148.77	64.3842	157.95	27588416
1171	-148.77	64.3842	157.84	27588408
1175.32	-148.77	64.3841	157.84	27588408
1179.57	-148.77	64.3841	157.57	27588402
1184.52	-148.77	64.3841	157.65	27588393
1189.23	-148.77	64.384	157.69	27588356
1193.24	-148.769	64.384	157.53	27588336
1198.04	-148.769	64.3839	157.7	27588331
1201.33	-148.77	64.3839	157.59	27588323
1205.16	-148.77	64.3839	157.59	27588323
1210.11	-148.77	64.3838	157.62	27588276
1215.05	-148.77	64.3838	157.64	27588250
1219.6	-148.77	64.3837	157.62	27588209
1223.62	-148.769	64.3837	157.37	27588193
1228.57	-148.769	64.3837	157.37	27588160
1233.52	-148.769	64.3836	157.46	27588154
1238.47	-148.769	64.3836	157.49	27588062
1243.41	-148.769	64.3835	157.44	27588044
1248.33	-148.769	64.3835	157.52	27588029
1251.32	-148.77	64.3835	157.61	27588016
1254.3	-148.77	64.3834	157.61	27588016
1257.65	-148.77	64.3834	157.58	27588012
1262.24	-148.77	64.3833	157.72	27588003
1265.22	-148.77	64.3833	157.7	27587999
1269.72	-148.77	64.3833	157.75	27587987
1274.67	-148.77	64.3832	157.83	27587971
1278.11	-148.77	64.3832	157.87	27587953
1281.09	-148.77	64.3832	157.87	27587953
1284.08	-148.77	64.3831	157.79	27587952
1288.91	-148.77	64.3831	157.81	27587931
1293.86	-148.77	64.383	157.92	27587916
1296.96	-148.77	64.383	157.71	27587901
1300.92	-148.774	64.3827	157.72	27581705
1300.98	-148.77	64.383	157.73	27587895
1301.65	-148.774	64.3827	157.68	27581721
1301.9	-148.774	64.3827	157.97	27581690
1302.37	-148.774	64.3827	157.69	27581748
1303.1	-148.774	64.3827	157.6	27581759
1303.82	-148.773	64.3827	157.49	27584467
1304.54	-148.773	64.3827	157.32	27584490
1304.88	-148.774	64.3826	157.95	27581685
1305.27	-148.773	64.3827	157.25	27584508
1305.93	-148.77	64.3829	157.77	27587870
1305.99	-148.773	64.3827	157.38	27584517
1306.72	-148.773	64.3827	157.57	27584556
1307.44	-148.773	64.3827	157.71	27584564
1307.87	-148.774	64.3826	157.84	27581681
1308.17	-148.773	64.3827	157.79	27584573
1308.89	-148.773	64.3827	157.83	27584586
1309.61	-148.773	64.3827	157.8	27584603
1310.15	-148.775	64.3825	157.35	27581565
1310.22	-148.775	64.3825	157.47	27581552
1310.34	-148.773	64.3827	157.71	27584680
1310.86	-148.774	64.3826	157.84	27581681
1310.87	-148.775	64.3825	157.5	27581627
1310.88	-148.77	64.3829	157.71	27587859
1311.06	-148.772	64.3827	157.58	27584695
1311.6	-148.774	64.3825	157.77	27581639
1312.32	-148.774	64.3825	157.87	27581655
1313.04	-148.774	64.3825	157.77	27581668
1313.21	-148.775	64.3825	157.88	27581497
1313.57	-148.772	64.3827	157.58	27584695
1314.79	-148.77	64.3828	157.71	27587859
1316.19	-148.775	64.3824	158.38	27581496
1316.98	-148.772	64.3827	157.63	27584881
1317.16	-148.772	64.3826	157.45	27584705
1317.32	-148.772	64.3827	157.76	27584835
1317.7	-148.771	64.3827	157.58	27584910
1317.77	-148.77	64.3828	157.61	27585228
1317.88	-148.772	64.3826	157.39	27584727
1318.43	-148.771	64.3827	157.65	27584944
1318.61	-148.772	64.3826	157.46	27584770
1319.15	-148.771	64.3827	157.59	27584952
1319.33	-148.772	64.3826	157.61	27584787
1319.88	-148.771	64.3827	157.65	27584958
1319.94	-148.775	64.3824	158.38	27581496
1320.05	-148.772	64.3826	157.73	27584807
1320.3	-148.772	64.3827	157.73	27584822
1320.6	-148.771	64.3827	157.76	27584979
1320.76	-148.77	64.3828	157.58	27585227
1321.32	-148.771	64.3827	157.8	27584994
1322.05	-148.771	64.3827	157.74	27585032
1322.77	-148.771	64.3827	157.64	27585053
1323.5	-148.771	64.3827	157.59	27585061
1323.74	-148.77	64.3827	157.58	27585227
1324.13	-148.775	64.3824	158.49	27581484
1324.22	-148.771	64.3827	157.62	27585076
1324.95	-148.77	64.3827	157.59	27585215
1325.67	-148.77	64.3827	157.46	27585226
1326.49	-148.775	64.3823	158.74	27581472
1327.11	-148.775	64.3823	158.66	27581477
1329.37	-148.775	64.3823	158.88	27581466
1333.45	-148.775	64.3823	158.8	27581357
1337.31	-148.775	64.3822	158.8	27581357
1340.58	-148.775	64.3822	158.26	27581353
1345.24	-148.775	64.3822	158.2	27581131
1348.23	-148.775	64.3821	157.84	27581108
1351.21	-148.776	64.3821	157.76	27581032
1354.2	-148.776	64.3821	157.76	27581032
1357.19	-148.776	64.382	157.87	27581031
1360.17	-148.776	64.382	157.91	27581030
1363.16	-148.776	64.382	157.91	27581030
1366.29	-148.776	64.3819	158.03	27581029
1371.09	-148.776	64.3819	158.19	27581017
1374.08	-148.776	64.3818	157.98	27581015
1378.36	-148.776	64.3818	158	27580888
1382.01	-148.776	64.3818	158	27580888
1385.48	-148.776	64.3817	157.96	27580879
1389.94	-148.776	64.3817	158.13	27580850
1392.93	-148.776	64.3817	158.18	27580848
1397.54	-148.776	64.3816	158.38	27580608
1400.86	-148.776	64.3816	158.38	27580605
1404.67	-148.776	64.3815	158.38	27580605
1408.8	-148.776	64.3815	158.68	27580592
1411.78	-148.776	64.3815	158.49	27580584
1414.77	-148.776	64.3814	158.26	27580582
1418.91	-148.776	64.3814	158.38	27580409
1423.86	-148.776	64.3814	158.63	27580384
1427.65	-148.776	64.3813	158.63	27580384
1430.64	-148.777	64.3813	158.47	27580377
1433.62	-148.777	64.3812	158.28	27580375
1436.61	-148.777	64.3812	158.17	27580358
1440.27	-148.777	64.3812	158.17	27580358
1445.22	-148.777	64.3811	158.16	27580345
1449.49	-148.777	64.3811	158.31	27580325
1452.48	-148.777	64.3811	158.24	27580323
1455.46	-148.777	64.381	158.27	27580206
1459.46	-148.777	64.381	158.4	27580198
1463.4	-148.777	64.381	158.4	27580198
1466.58	-148.777	64.3809	158.13	27580192
1471.53	-148.777	64.3809	157.98	27580173
1476.48	-148.777	64.3808	158.02	27580162
1481.33	-148.777	64.3808	158.15	27580148
1485.34	-148.777	64.3808	157.95	27580143
1489.99	-148.777	64.3807	157.65	27580135
1494.94	-148.777	64.3807	157.5	27579898
1499.89	-148.777	64.3806	157.54	27579874
1504.84	-148.777	64.3806	157.67	27579859
1508.43	-148.777	64.3805	157.67	27579859
1511.96	-148.777	64.3805	157.49	27579850
1516.9	-148.777	64.3805	157.56	27579834
1521.85	-148.777	64.3804	157.72	27579825
1526.8	-148.777	64.3804	157.93	27579815
1531.75	-148.777	64.3803	158.15	27579810
1536.16	-148.777	64.3803	158.37	27579786
1539.14	-148.777	64.3803	158.53	27579778
1543.81	-148.777	64.3802	158.61	27579772
1548.76	-148.777	64.3802	158.68	27579766
1553.71	-148.777	64.3801	158.72	27579756
1558.66	-148.777	64.3801	158.73	27579744
1563.6	-148.777	64.38	158.7	27579733
1568.55	-148.777	64.38	158.68	27579720
1573.5	-148.777	64.3799	158.68	27579710
1578.45	-148.777	64.3799	158.71	27579684
1581.71	-148.777	64.3799	158.76	27579663
1585.57	-148.777	64.3798	158.76	27579663
1590.51	-148.777	64.3798	158.8	27579653
1595.46	-148.777	64.3797	158.82	27579637
1600.41	-148.777	64.3797	158.79	27578981
1605.36	-148.777	64.3796	158.71	27578954
1610.3	-148.777	64.3796	158.59	27578931
1615.25	-148.777	64.3796	158.48	27578919
1620.2	-148.777	64.3795	158.44	27578912
1624.27	-148.777	64.3795	158.47	27578891
1627.32	-148.777	64.3794	158.53	27578885
1632.27	-148.777	64.3794	158.56	27578870
1637.21	-148.777	64.3793	158.55	27578834
1642.16	-148.777	64.3793	158.57	27578680
1647.08	-148.777	64.3793	158.65	27578655
1651.09	-148.777	64.3792	158.68	27578597
1655.1	-148.777	64.3792	158.68	27578597
1659.11	-148.777	64.3792	158.71	27578596
1663.12	-148.777	64.3791	158.7	27578595
1667.13	-148.777	64.3791	158.65	27578594
1671.14	-148.777	64.3791	158.65	27578594
1675.15	-148.777	64.379	158.69	27578593
1680.06	-148.777	64.379	158.89	27578592
1684.11	-148.777	64.379	159.02	27578582
1688.12	-148.777	64.3789	159.02	27578582
1692.13	-148.776	64.3789	158.86	27578579
1696.14	-148.776	64.3789	158.65	27568751
1700.15	-148.776	64.3788	158.66	27568750
1704.16	-148.776	64.3788	158.66	27568750
1708.17	-148.776	64.3788	158.68	27568749
1712.18	-148.776	64.3788	158.86	27568748
1716.19	-148.776	64.3787	158.86	27568748
1720.2	-148.776	64.3787	158.98	27568747
1724.21	-148.776	64.3787	158.89	27568746
1728.22	-148.776	64.3786	158.89	27568746
1732.23	-148.776	64.3786	158.65	27568745
1736.24	-148.776	64.3786	158.48	27568744
1740.25	-148.776	64.3785	158.53	27568743
1744.26	-148.776	64.3785	158.53	27568743
1748.27	-148.775	64.3785	158.57	27568742
1752.28	-148.775	64.3784	158.69	27568741
1756.29	-148.775	64.3784	158.69	27568741
1760.3	-148.775	64.3784	158.57	27568740
1764.31	-148.775	64.3784	157.93	27568738
1765.87	-148.775	64.3783	157.47	27566116
1766.6	-148.775	64.3783	157.39	27566098
1769.77	-148.775	64.3783	157.4	27566089
1773.78	-148.775	64.3783	157.4	27566089
1777.79	-148.775	64.3783	157.72	27566062
1781.8	-148.775	64.3782	157.9	27566061
1785.82	-148.775	64.3782	157.9	27566061
1787.9	-148.774	64.3782	159.23	27565969
1788.38	-148.774	64.3782	159.31	27565999
1788.63	-148.774	64.3782	159.28	27565628
1789.35	-148.774	64.3782	159.5	27565527
1789.53	-148.774	64.3782	158.76	27566060
1790.25	-148.774	64.3782	159.18	27566058
1790.98	-148.774	64.3782	159.51	27566041
1791.37	-148.774	64.3782	159.5	27566000
1792.3	-148.774	64.3782	159.5	27565527
1796.31	-148.774	64.3782	159.48	27565525
1800.32	-148.774	64.3781	159.21	27565518
1801.54	-148.773	64.3781	159.24	27565506
1802.27	-148.773	64.3781	159.11	27565495
1802.99	-148.773	64.3781	159.12	27565483
1803.72	-148.773	64.3781	159.22	27565470
1804.44	-148.773	64.3781	159.33	27565453
1807.95	-148.773	64.3781	159.15	27565444
1810.54	-148.773	64.3781	159.15	27565444
1811.26	-148.773	64.3781	159.27	27565410
1813.41	-148.773	64.3781	159.38	27565396
1817.36	-148.773	64.3781	159.3	27565391
1818.14	-148.772	64.3781	159.23	27565356
1822.15	-148.772	64.378	159.18	27565354
1826.16	-148.772	64.378	159.18	27565354
1829.55	-148.772	64.378	159.04	27565019
1830.27	-148.772	64.378	159.17	27565002
1831	-148.772	64.378	159.33	27564970
1831.72	-148.772	64.378	159.41	27564889
1833.07	-148.772	64.378	159.44	27564879
1837.08	-148.772	64.3779	159.38	27564877
1841.09	-148.772	64.3779	159.33	27563889
1845.1	-148.772	64.3779	159.33	27563889
1849.11	-148.772	64.3778	159.43	27563888
1853.12	-148.771	64.3778	159.33	27563886
1857.13	-148.771	64.3778	159.33	27563886
1861.14	-148.771	64.3778	159.35	27563878
1865.15	-148.771	64.3777	159.47	27563854
1869.82	-148.771	64.3777	159.71	27563853
1874.11	-148.771	64.3777	159.71	27563853
1878.12	-148.771	64.3776	159.86	27563847
1882.13	-148.771	64.3776	159.93	27563830
1886.14	-148.771	64.3776	160.05	27563806
1890.15	-148.771	64.3775	160.05	27563806
1894.16	-148.771	64.3775	160.23	27563795
1898.17	-148.771	64.3775	160.21	27563784
1902.18	-148.771	64.3774	160.21	27563784
1906.19	-148.771	64.3774	160	27563736
1910.2	-148.771	64.3774	159.7	27563729
1914.97	-148.77	64.3773	159.93	27563678
1919.16	-148.77	64.3773	160.03	27563673
1923.54	-148.77	64.3773	160.03	27563673
1928.48	-148.77	64.3772	160.05	27563670
1933.07	-148.77	64.3772	160.22	27563631
1937.08	-148.77	64.3771	160.14	27563613
1942	-148.77	64.3771	160.08	27563588
1946.03	-148.77	64.3771	159.74	27563578
1950.57	-148.77	64.377	159.7	27563528
1955.52	-148.77	64.377	159.83	27563504
1959.94	-148.77	64.3769	159.83	27563504
1963.95	-148.77	64.3769	159.74	27563487
1967.96	-148.77	64.3769	159.83	27563483
1972.66	-148.77	64.3768	160.12	27563475
1976.92	-148.77	64.3768	160.08	27563446
1981.23	-148.77	64.3768	160.08	27563446
1985.87	-148.77	64.3767	160.17	27563440
1989.88	-148.77	64.3767	160.11	27563432
1993.89	-148.77	64.3767	160.07	27563424
1998.37	-148.77	64.3766	160.07	27563424
2002.85	-148.77	64.3766	160.25	27563409
2006.86	-148.769	64.3766	160.39	27563398
2010.87	-148.769	64.3765	160.43	27563385
2015.51	-148.769	64.3765	160.25	27563379
2020.45	-148.769	64.3765	160.22	27563339
2024.78	-148.769	64.3764	160.22	27563339
2029.02	-148.769	64.3764	160.05	27563306
2033.97	-148.769	64.3763	160	27563298
2038.68	-148.769	64.3763	160.09	27563285
2042.69	-148.769	64.3763	160.07	27563282
2047.49	-148.769	64.3762	160.1	27563114
2052.43	-148.769	64.3762	160.09	27563070
2057.38	-148.769	64.3761	160.11	27563028
2061.55	-148.769	64.3761	159.95	27563013
2065.95	-148.769	64.3761	159.95	27563013
2070.5	-148.769	64.376	160.07	27563010
2074.52	-148.769	64.376	159.95	27562997
2079.47	-148.769	64.3759	159.94	27562993
2084.41	-148.769	64.3759	160	27562976
2089.36	-148.769	64.3759	160.1	27562963
2094.31	-148.769	64.3758	160.15	27562940
2099.26	-148.769	64.3758	160.15	27562930
2104.2	-148.769	64.3757	160.16	27562919
2109.14	-148.769	64.3757	160.22	27562906
2113.15	-148.769	64.3756	160.01	27562898
2117.72	-148.769	64.3756	160.08	27562893
2122.67	-148.769	64.3756	160.14	27562877
2127.61	-148.769	64.3755	160.13	27562827
2132.01	-148.769	64.3755	160.13	27562827
2136.02	-148.769	64.3755	160.16	27562690
2140.03	-148.769	64.3754	160.2	27562689
2144.04	-148.769	64.3754	160.3	27562688
2146.9	-148.768	64.3754	160.3	27562688
2147.62	-148.768	64.3754	160.51	27562687
2149.5	-148.768	64.3754	160.79	27562683
2153.51	-148.768	64.3753	160.95	27562680
2154.44	-148.768	64.3753	160.87	27562676
2155.17	-148.768	64.3753	160.77	27562666
2158.97	-148.768	64.3753	160.73	27562225
2162.98	-148.768	64.3753	160.73	27562225
2167.09	-148.768	64.3752	160.53	27562222
2171.93	-148.768	64.3752	160.63	27562208
2175.94	-148.768	64.3752	160.19	27562203
2180.6	-148.768	64.3751	160.16	27562201
2185.55	-148.768	64.3751	159.97	27562186
2190.5	-148.768	64.375	159.99	27562175
2195.45	-148.768	64.375	160.15	27562164
2200.39	-148.768	64.3749	160.36	27562158
2205.34	-148.768	64.3749	160.54	27562149
2210.29	-148.768	64.3749	160.71	27561979
2215.23	-148.768	64.3748	160.83	27561942
2218.82	-148.768	64.3748	160.83	27561942
2221.81	-148.768	64.3747	160.81	27561924
2224.79	-148.768	64.3747	160.5	27561923
2227.78	-148.768	64.3747	160.56	27561916
2230.77	-148.768	64.3746	160.56	27561916
2233.75	-148.768	64.3746	160.24	27561911
2236.74	-148.768	64.3746	159.87	27561905
2239.73	-148.768	64.3745	159.87	27561905
2243.12	-148.768	64.3745	159.85	27561892
2248.07	-148.768	64.3745	159.95	27561874
2252.61	-148.768	64.3744	160.06	27561764
2255.59	-148.768	64.3744	159.93	27561755
2260.13	-148.768	64.3744	159.88	27561738
2265.08	-148.768	64.3743	159.86	27561675
2268.47	-148.768	64.3743	159.89	27561672
2271.46	-148.768	64.3742	159.89	27561672
2274.45	-148.769	64.3742	159.87	27561652
2279.32	-148.769	64.3742	159.96	27561634
2284.27	-148.769	64.3741	160.03	27561596
2289.22	-148.769	64.3741	160.1	27561585
2294.17	-148.769	64.374	160.14	27561575
2297.22	-148.769	64.374	159.94	27561570
2301.29	-148.769	64.374	159.88	27561540
2305.15	-148.769	64.3739	159.88	27561540
2308.41	-148.769	64.3739	159.67	27561504
2313.09	-148.769	64.3738	159.85	27561496
2316.07	-148.769	64.3738	159.82	27561484
2319.06	-148.769	64.3738	159.93	27561470
2322.65	-148.769	64.3737	159.93	27561470
2327.6	-148.769	64.3737	160.25	27561459
2331.94	-148.769	64.3737	160.49	27560848
2334.93	-148.769	64.3736	160.42	27560839
2337.91	-148.769	64.3736	160.55	27560327
2340.9	-148.769	64.3736	160.55	27560327
2343.89	-148.769	64.3735	160.74	27560326
2346.87	-148.769	64.3735	160.74	27560325
2349.86	-148.769	64.3735	160.74	27560325
2352.84	-148.769	64.3734	160.65	27560324
2355.83	-148.769	64.3734	160.5	27560323
2358.82	-148.77	64.3734	160.28	27560322
2361.8	-148.77	64.3733	160.28	27560322
2364.79	-148.77	64.3733	160.12	27560321
2367.78	-148.77	64.3733	160.65	27560320
2370.76	-148.77	64.3732	160.65	27560320
2373.75	-148.77	64.3732	160.93	27560318
2376.73	-148.77	64.3732	160.78	27560315
2381.19	-148.77	64.3731	160.87	27560286
2384.67	-148.77	64.3731	160.78	27560272
2387.65	-148.77	64.3731	160.78	27560272
2390.64	-148.77	64.373	160.95	27560269
2393.63	-148.77	64.373	160.71	27560265
2397.61	-148.77	64.3729	160.7	27560242
2401.56	-148.77	64.3729	160.7	27560242
2404.73	-148.77	64.3729	160.45	27560228
2409.49	-148.77	64.3728	160.49	27560144
2412.48	-148.77	64.3728	160.34	27560139
2416.8	-148.771	64.3728	160.37	27560124
2420.41	-148.771	64.3727	160.37	27560124
2423.92	-148.771	64.3727	160.28	27560101
2428.35	-148.771	64.3726	160.42	27560056
2431.33	-148.771	64.3726	160.6	27560052
2434.32	-148.771	64.3726	160.64	27559796
2437.3	-148.771	64.3725	160.64	27559796
2440.29	-148.771	64.3725	160.55	27559785
2443.28	-148.771	64.3725	160.68	27559781
2446.26	-148.771	64.3724	160.68	27559781
2449.25	-148.771	64.3724	160.48	27559775
2452.23	-148.771	64.3724	160.01	27559773
2456.75	-148.771	64.3723	159.81	27559763
2461.7	-148.771	64.3723	159.73	27559665
2466.65	-148.771	64.3723	159.84	27559636
2470.06	-148.771	64.3722	160.2	27559626
2473.77	-148.771	64.3722	160.2	27559626
2478.72	-148.771	64.3721	160.75	27559625
2482.94	-148.771	64.3721	161.39	27559622
2485.93	-148.771	64.3721	161.83	27559619
2490.78	-148.771	64.372	161.76	27559618
2495.73	-148.771	64.372	161.75	27559602
2500.68	-148.771	64.3719	161.84	27559542
2503.76	-148.771	64.3719	161.95	27559496
2506.74	-148.772	64.3719	161.95	27559496
2509.73	-148.772	64.3718	162.23	27559487
2512.72	-148.772	64.3718	162.28	27559485
2517.1	-148.772	64.3718	162.25	27559470
2520.65	-148.772	64.3717	162.14	27559455
2523.64	-148.772	64.3717	162.14	27559455
2526.62	-148.772	64.3717	162.19	27559452
2531.34	-148.772	64.3716	162.3	27557369
2534.56	-148.772	64.3716	162.28	27557363
2538.02	-148.772	64.3715	162.28	27557363
2542.03	-148.772	64.3715	162.4	27557353
2546.04	-148.772	64.3715	162.38	27557351
2550.65	-148.772	64.3714	162.4	27557325
2555.6	-148.772	64.3714	162.47	27557308
2559.29	-148.772	64.3714	162.47	27557308
2562.72	-148.772	64.3713	162.45	27557307
2567.67	-148.772	64.3713	162.34	27557270
2572.61	-148.772	64.3712	162.27	27557257
2577.56	-148.772	64.3712	162.25	27557241
2582.07	-148.772	64.3711	162.29	27556180
2585.05	-148.772	64.3711	162.24	27556178
2589.63	-148.772	64.3711	162.32	27556172
2594.58	-148.772	64.371	162.41	27556168
2599.52	-148.772	64.371	162.49	27556167
2602.88	-148.772	64.3709	162.49	27556161
2606.64	-148.772	64.3709	162.49	27556161
2611.59	-148.772	64.3709	162.39	27556126
2616.54	-148.772	64.3708	162.19	27554870
2621.49	-148.772	64.3708	161.95	27554798
2626.43	-148.772	64.3707	161.75	27554790
2631.38	-148.772	64.3707	161.65	27554781
2635.96	-148.772	64.3706	161.68	27554769
2639.97	-148.772	64.3706	161.66	27554762
2644.9	-148.772	64.3706	161.75	27554734
2649.85	-148.772	64.3705	161.69	27554720
2653.87	-148.772	64.3705	161.73	27554708
2658.41	-148.772	64.3705	161.87	27554656
2662.83	-148.772	64.3704	161.87	27554656
2666.84	-148.772	64.3704	161.81	27554641
2670.85	-148.772	64.3704	161.85	27553845
2674.86	-148.772	64.3703	161.86	27553844
2678.87	-148.771	64.3703	161.86	27553844
2682.88	-148.771	64.3703	161.9	27553843
2686.89	-148.771	64.3702	161.82	27553842
2690.9	-148.771	64.3702	161.82	27553842
2694.91	-148.771	64.3702	161.58	27553841
2698.92	-148.771	64.3701	161.32	27553840
2702.93	-148.771	64.3701	161.32	27553840
2706.94	-148.771	64.3701	161.43	27553839
2710.95	-148.771	64.3701	161.4	27553838
2714.96	-148.771	64.37	161.49	27553835
2718.97	-148.771	64.37	161.49	27553835
2722.95	-148.771	64.37	161.32	27553830
2723.71	-148.771	64.37	161.4	27553795
2727.72	-148.77	64.3699	161.39	27553758
2731.73	-148.77	64.3699	161.39	27553758
2735.74	-148.77	64.3699	161.34	27553692
2739.75	-148.77	64.3698	161.29	27553688
2741.23	-148.77	64.3698	161.38	27553658
2744.48	-148.77	64.3698	161.3	27553640
2748.5	-148.77	64.3698	161.3	27553640
2752.51	-148.77	64.3697	161.18	27553624
2756.52	-148.77	64.3697	161.13	27553623
2758.8	-148.77	64.3697	161.21	27553567
2761.25	-148.77	64.3697	161.21	27553567
2765.26	-148.77	64.3697	161.23	27553560
2769.27	-148.769	64.3696	161.09	27553545
2770.99	-148.769	64.3696	161.18	27553536
2774.01	-148.769	64.3696	161.18	27553536
2777.08	-148.769	64.3696	161.16	27553517
2778.74	-148.769	64.3696	161.41	27552318
2782.75	-148.769	64.3695	161.41	27552307
2786.76	-148.769	64.3695	161.39	27552300
2790.77	-148.769	64.3695	161.39	27552300
2794.65	-148.769	64.3694	161.41	27552258
2795.37	-148.769	64.3694	161.44	27552251
2796.09	-148.769	64.3694	161.56	27552234
2796.82	-148.769	64.3694	161.8	27552221
2797.68	-148.768	64.3694	162.16	27552219
2801.69	-148.768	64.3694	162.46	27552207
2803.64	-148.768	64.3694	162.74	27552199
2806.42	-148.768	64.3694	162.74	27552199
2809.73	-148.768	64.3694	162.77	27552196
2810.46	-148.768	64.3694	162.66	27552193
2811.88	-148.768	64.3694	162.51	27552186
2815.89	-148.768	64.3693	162.42	27552174
2817.28	-148.768	64.3693	162.51	27552127
2818	-148.768	64.3693	162.63	27552112
2818.73	-148.768	64.3693	162.66	27552107
2819.45	-148.767	64.3693	162.72	27552102
2822.8	-148.767	64.3693	162.71	27552087
2825.55	-148.767	64.3693	162.71	27552087
2826.27	-148.767	64.3693	162.66	27552084
2828.26	-148.767	64.3693	162.73	27552053
2832.27	-148.767	64.3692	162.4	27552043
2836.28	-148.767	64.3692	162.44	27552041
2838.46	-148.767	64.3692	162.55	27552036
2841.01	-148.767	64.3692	162.55	27552036
2844.56	-148.767	64.3692	162.41	27552031
2845.28	-148.767	64.3692	162.45	27551992
2846.01	-148.766	64.3692	162.43	27551964
2846.73	-148.766	64.3692	162.37	27551947
2847.45	-148.766	64.3692	162.29	27551931
2848.64	-148.766	64.3692	162.22	27551926
2852.65	-148.766	64.3691	162.4	27551848
2856.66	-148.766	64.3691	162.38	27551847
2860.68	-148.766	64.3691	162.38	27551847
2864.69	-148.766	64.369	162.74	27551843
2869.54	-148.766	64.369	162.79	27551824
2873.64	-148.766	64.369	162.53	27551819
2878.11	-148.766	64.3689	162.53	27551819
2882.6	-148.766	64.3689	162.37	27551554
2886.61	-148.766	64.3689	162.62	27551551
2890.62	-148.766	64.3688	162.87	27551545
2894.63	-148.765	64.3688	162.87	27551545
2898.64	-148.765	64.3688	162.92	27551538
2902.65	-148.765	64.3687	162.8	27551527
2907.44	-148.765	64.3687	162.51	27551453
2911.61	-148.765	64.3687	162.26	27551442
2915.62	-148.765	64.3686	162.26	27551442
2919.63	-148.765	64.3686	162.04	27551440
2924.58	-148.765	64.3685	162	27551412
2928.59	-148.765	64.3685	161.88	27551404
2933.15	-148.765	64.3685	161.75	27551364
2938.09	-148.765	64.3684	162.04	27551361
2942.49	-148.765	64.3684	162.04	27551361
2946.66	-148.765	64.3684	162.08	27551356
2950.42	-148.78	64.3672	163.75	27534987
2951.15	-148.78	64.3672	163.66	27535017
2951.45	-148.765	64.3683	162.23	27551322
2951.87	-148.779	64.3672	163.67	27535049
2952.81	-148.779	64.3672	163.73	27535068
2953.16	-148.78	64.3672	163.74	27534626
2955.46	-148.765	64.3683	162.72	27551308
2956.15	-148.78	64.3671	163.74	27534626
2956.82	-148.779	64.3672	164.01	27535090
2956.83	-148.777	64.3673	162.98	27536254
2957.56	-148.777	64.3673	162.61	27536265
2957.66	-148.777	64.3673	163.43	27536238
2958.28	-148.777	64.3673	162.31	27536275
2958.69	-148.779	64.3672	164.12	27535107
2959.01	-148.777	64.3673	162.12	27536293
2959.13	-148.78	64.3671	163.68	27534625
2959.41	-148.779	64.3672	164.15	27535564
2959.73	-148.777	64.3673	162.07	27536303
2960.14	-148.779	64.3672	164.11	27535617
2960.18	-148.765	64.3682	162.97	27551304
2960.45	-148.777	64.3673	162.18	27536337
2960.65	-148.778	64.3673	163.64	27536234
2960.86	-148.779	64.3672	164.07	27535635
2961.18	-148.777	64.3673	162.28	27536475
2961.59	-148.779	64.3672	164.1	27535641
2961.9	-148.777	64.3673	162.5	27536479
2962.12	-148.78	64.3671	163.61	27534624
2962.31	-148.779	64.3672	164.16	27535673
2963.04	-148.779	64.3672	164.26	27535962
2963.63	-148.778	64.3672	163.75	27536201
2963.76	-148.778	64.3672	164.19	27535966
2964.42	-148.765	64.3682	163.17	27551298
2964.54	-148.777	64.3673	162.5	27536479
2965.11	-148.78	64.367	163.61	27534624
2966.62	-148.778	64.3672	163.75	27536201
2966.63	-148.778	64.3672	164.19	27535966
2968.09	-148.78	64.367	163.62	27534623
2968.55	-148.776	64.3673	162.91	27536483
2968.75	-148.765	64.3682	163.17	27551298
2969.61	-148.778	64.3672	163.41	27536200
2969.86	-148.778	64.3671	163.97	27535968
2970.58	-148.778	64.3671	163.57	27535975
2971.08	-148.78	64.367	163.72	27534622
2971.3	-148.778	64.3671	163.18	27535988
2971.75	-148.765	64.3681	163.07	27551295
2972.03	-148.778	64.3671	163	27536000
2972.3	-148.765	64.3681	163.45	27551255
2972.56	-148.776	64.3673	163.24	27536484
2972.59	-148.778	64.3671	163.15	27536199
2972.75	-148.778	64.3671	163.04	27536016
2974.06	-148.78	64.3669	163.81	27534621
2975.29	-148.765	64.3681	164.03	27551254
2976.57	-148.776	64.3672	163.18	27536485
2977.05	-148.78	64.3669	163.81	27534621
2978.27	-148.765	64.3681	163.99	27551253
2980.04	-148.78	64.3669	163.88	27534620
2980.58	-148.776	64.3672	163.18	27536485
2982.27	-148.765	64.368	163.88	27551212
2983.02	-148.78	64.3668	163.95	27534619
2984.59	-148.776	64.3672	163.13	27536580
2985.56	-148.776	64.3672	163.24	27536592
2986.01	-148.781	64.3668	163.95	27534619
2986.28	-148.776	64.3672	163.32	27536606
2987.01	-148.776	64.3672	163.4	27536623
2987.22	-148.765	64.368	163.76	27551203
2987.73	-148.776	64.3672	163.41	27536639
2988.46	-148.776	64.3672	163.43	27536669
2989	-148.781	64.3668	163.95	27534618
2989.18	-148.776	64.3672	163.33	27536679
2989.91	-148.775	64.3672	163.25	27536724
2990.63	-148.775	64.3672	163.28	27537622
2991.35	-148.775	64.3672	163.33	27537649
2991.98	-148.781	64.3667	163.99	27534617
2992.08	-148.775	64.3672	163.38	27537669
2992.16	-148.765	64.3679	163.66	27551032
2992.8	-148.775	64.3672	163.46	27537682
2993.53	-148.775	64.3672	163.47	27537690
2994.97	-148.781	64.3667	163.76	27534616
2997.11	-148.765	64.3679	163.81	27551030
2997.29	-148.775	64.3671	163.5	27537701
2998.69	-148.781	64.3667	163.76	27534616
3001.3	-148.775	64.3671	163.5	27537701
3002.06	-148.765	64.3679	163.89	27550991
3003.64	-148.781	64.3666	164.02	27534608
3004.99	-148.775	64.3671	163.28	27537703
3005.72	-148.775	64.3671	163.18	27537715
3006.76	-148.774	64.3671	163.3	27537726
3007	-148.765	64.3678	164.06	27550987
3008.59	-148.781	64.3666	164.24	27534606
3009.46	-148.774	64.3671	163.28	27538032
3009.78	-148.765	64.3678	164.33	27550977
3010.19	-148.774	64.3671	163.2	27538041
3010.77	-148.774	64.3671	163.5	27537735
3010.91	-148.774	64.3671	163.02	27538054
3011.46	-148.774	64.3671	163.21	27537833
3012.19	-148.765	64.3678	164.33	27550977
3012.51	-148.774	64.3671	162.77	27538066
3012.54	-148.774	64.367	163.37	27537748
3013.26	-148.774	64.367	163.21	27537833
3013.54	-148.781	64.3665	164.36	27534592
3016.2	-148.765	64.3677	164.37	27550976
3016.52	-148.774	64.3671	162.88	27538073
3017.73	-148.774	64.3671	163.06	27538098
3018.13	-148.781	64.3665	164.44	27534583
3018.46	-148.773	64.3671	163.16	27538105
3019.18	-148.773	64.3671	163.15	27538115
3019.9	-148.773	64.3671	163.18	27538124
3020.22	-148.765	64.3677	163.86	27550961
3020.63	-148.773	64.3671	163.23	27538134
3022.14	-148.781	64.3665	164.71	27534567
3024.16	-148.773	64.367	163.35	27538138
3024.87	-148.765	64.3677	163.69	27550846
3027.05	-148.781	64.3664	165.11	27534553
3028.17	-148.773	64.367	163.35	27538138
3029.17	-148.765	64.3676	163.69	27550846
3031.1	-148.781	64.3664	165.25	27534552
3032.18	-148.773	64.367	163.43	27538139
3033.44	-148.764	64.3676	163.24	27550837
3035.62	-148.781	64.3664	165.14	27534550
3036.19	-148.773	64.3669	163.25	27538142
3038.38	-148.764	64.3676	163.27	27550826
3040.2	-148.773	64.3669	163.25	27538142
3040.57	-148.781	64.3663	164.98	27534539
3043.33	-148.764	64.3675	163.26	27550811
3044.21	-148.773	64.3669	163.02	27538144
3045.52	-148.781	64.3663	164.89	27534519
3047.75	-148.764	64.3675	163.34	27550771
3048.22	-148.773	64.3668	163.06	27538145
3050.46	-148.781	64.3662	164.96	27534489
3050.73	-148.765	64.3674	162.89	27550754
3052.23	-148.773	64.3668	163.21	27538146
3052.3	-148.781	64.3662	165.43	27534473
3053.61	-148.781	64.3662	165.43	27534473
3055.4	-148.765	64.3674	162.7	27550746
3056.24	-148.772	64.3668	163.21	27538146
3056.86	-148.781	64.3662	165.26	27534472
3060.25	-148.772	64.3668	162.95	27538147
3060.35	-148.765	64.3673	162.62	27550737
3061.81	-148.781	64.3661	165.02	27533213
3064.26	-148.772	64.3667	162.92	27539154
3065.29	-148.765	64.3673	162.61	27550730
3066.49	-148.781	64.3661	165	27533199
3068.27	-148.772	64.3667	162.92	27539154
3069.48	-148.781	64.366	165.14	27533197
3070.24	-148.765	64.3673	162.6	27550720
3072.28	-148.772	64.3667	163.01	27539155
3072.46	-148.781	64.366	164.79	27533166
3075.19	-148.765	64.3672	162.52	27550544
3075.45	-148.781	64.366	164.79	27533166
3076.29	-148.772	64.3666	162.86	27539156
3078.44	-148.781	64.3659	164.35	27533165
3080.14	-148.765	64.3672	162.43	27550539
3080.3	-148.772	64.3666	162.78	27539186
3081.42	-148.781	64.3659	163.69	27533164
3084.59	-148.772	64.3666	162.78	27539186
3085.08	-148.765	64.3671	162.51	27550252
3085.35	-148.781	64.3659	163.69	27533164
3088.35	-148.765	64.3671	162.53	27550247
3089.36	-148.781	64.3658	163.83	27533145
3089.54	-148.772	64.3665	162.77	27539962
3091.34	-148.765	64.3671	162.53	27550247
3092.47	-148.781	64.3658	163.58	27532788
3094.38	-148.765	64.367	162.71	27550242
3094.48	-148.772	64.3665	162.78	27539985
3097.29	-148.781	64.3657	163.81	27532730
3099.15	-148.772	64.3664	162.63	27540349
3099.27	-148.765	64.367	162.9	27550230
3100.28	-148.781	64.3657	163.47	27532707
3102.26	-148.765	64.3669	162.69	27550195
3103.16	-148.772	64.3664	162.58	27540360
3104.54	-148.781	64.3657	163.56	27532690
3106.27	-148.772	64.3664	162.77	27540368
3106.45	-148.765	64.3669	162.86	27550128
3108.21	-148.781	64.3656	163.56	27532690
3110.17	-148.772	64.3663	162.77	27540368
3110.19	-148.765	64.3669	162.86	27550128
3111.66	-148.781	64.3656	163.58	27532666
3113.18	-148.765	64.3668	162.78	27550098
3114.68	-148.772	64.3663	162.96	27540379
3116.16	-148.765	64.3668	162.84	27550010
3116.6	-148.781	64.3656	163.54	27532641
3118.69	-148.772	64.3663	163.12	27540416
3119.15	-148.765	64.3668	163.32	27547098
3121.55	-148.781	64.3655	163.51	27532627
3122.13	-148.765	64.3667	163.32	27547098
3122.7	-148.772	64.3662	163.17	27540421
3125.12	-148.765	64.3667	163.45	27547097
3126.5	-148.781	64.3655	163.59	27532609
3127.31	-148.772	64.3662	162.87	27540428
3128.11	-148.765	64.3667	163.26	27547096
3131.09	-148.765	64.3666	163.26	27547096
3131.45	-148.781	64.3654	163.83	27530189
3131.66	-148.772	64.3662	162.87	27540428
3134.08	-148.765	64.3666	163.27	27547095
3135.67	-148.772	64.3661	162.75	27540434
3136.17	-148.781	64.3654	164.14	27530162
3137.06	-148.766	64.3666	163.18	27547094
3139.68	-148.772	64.3661	162.63	27540442
3140.05	-148.766	64.3665	163.11	27547093
3140.18	-148.781	64.3653	164.41	27529811
3143.04	-148.766	64.3665	163.11	27547093
3143.69	-148.771	64.3661	162.54	27540451
3144.19	-148.781	64.3653	164.54	27529810
3146.02	-148.766	64.3665	162.98	27547092
3147.7	-148.771	64.366	162.54	27540451
3148.2	-148.781	64.3653	164.54	27529810
3149.01	-148.766	64.3664	162.96	27547091
3151.71	-148.771	64.366	162.62	27540452
3152	-148.766	64.3664	162.96	27547091
3152.21	-148.781	64.3653	164.52	27529809
3153.53	-148.766	64.3664	163.02	27547050
3154.04	-148.766	64.3664	162.91	27547077
3154.76	-148.766	64.3664	162.95	27547090
3155.72	-148.771	64.366	162.75	27540453
3156.22	-148.781	64.3652	164.46	27529808
3156.52	-148.766	64.3663	162.69	27547035
3159.51	-148.766	64.3663	162.69	27547035
3159.73	-148.771	64.3659	162.75	27540453
3160.23	-148.781	64.3652	164.46	27529808
3161.64	-148.766	64.3663	162.43	27547021
3161.77	-148.766	64.3663	162.58	27545581
3163.74	-148.771	64.3659	162.78	27540454
3163.99	-148.767	64.3662	162.5	27545544
3164.24	-148.781	64.3652	164.11	27529807
3164.71	-148.767	64.3662	162.51	27545561
3164.75	-148.767	64.3662	162.48	27545571
3166.29	-148.767	64.3662	162.41	27545491
3167.75	-148.771	64.3659	162.68	27544282
3167.79	-148.767	64.3662	162.41	27545491
3168.26	-148.781	64.3651	164.23	27529504
3168.55	-148.767	64.3662	162.58	27545475
3170.86	-148.767	64.3661	162.71	27545357
3171.54	-148.767	64.3661	162.54	27545465
3171.76	-148.771	64.3658	162.59	27544289
3172.27	-148.781	64.3651	164.53	27529503
3173.8	-148.767	64.3661	162.84	27545348
3173.94	-148.767	64.3661	163.18	27545326
3174.66	-148.767	64.3661	163.02	27545339
3174.7	-148.771	64.3658	162.59	27544289
3175.34	-148.768	64.3661	163.18	27545326
3176.28	-148.781	64.3651	164.53	27529503
3176.5	-148.771	64.3658	162.53	27544297
3177.6	-148.768	64.366	163.47	27545300
3177.74	-148.768	64.366	163.23	27545308
3177.91	-148.768	64.366	163.75	27545160
3178.64	-148.768	64.366	163.42	27545247
3179.17	-148.77	64.3658	163.21	27544406
3179.36	-148.768	64.366	163.19	27545258
3179.9	-148.77	64.3658	163.42	27544412
3179.95	-148.768	64.366	163.65	27545158
3180.09	-148.768	64.366	162.97	27545264
3180.29	-148.781	64.365	164.36	27529502
3180.31	-148.77	64.3658	163.21	27544406
3180.51	-148.771	64.3658	162.63	27544313
3180.59	-148.768	64.366	163.07	27545296
3180.62	-148.77	64.3658	163.42	27544428
3180.81	-148.768	64.366	162.96	27545282
3181.34	-148.77	64.3658	163.28	27544449
3181.52	-148.771	64.3658	162.49	27544344
3181.71	-148.768	64.3659	163.65	27545158
3182.07	-148.77	64.3658	163.22	27544489
3182.21	-148.769	64.3659	163.73	27545128
3182.25	-148.77	64.3658	162.54	27544364
3182.79	-148.77	64.3658	163.16	27544519
3182.97	-148.77	64.3658	162.78	27544399
3183.52	-148.77	64.3658	163.25	27544531
3184.06	-148.769	64.3659	163.37	27544877
3184.24	-148.769	64.3658	163.49	27544542
3184.3	-148.781	64.365	164.27	27529501
3184.79	-148.769	64.3659	163.26	27544908
3184.97	-148.769	64.3658	163.71	27544570
3185.2	-148.769	64.3659	163.33	27545126
3185.69	-148.769	64.3658	163.73	27544588
3186.41	-148.769	64.3658	163.66	27544647
3186.74	-148.769	64.3659	163.21	27544861
3187.14	-148.769	64.3658	163.69	27544820
3187.86	-148.769	64.3659	163.78	27544859
3188.31	-148.78	64.365	164.27	27529501
3192.32	-148.78	64.3649	164.4	27529500
3196.33	-148.78	64.3649	164.43	27529499
3200.34	-148.78	64.3649	164.43	27529499
3204.35	-148.78	64.3649	164.36	27529498
3208.36	-148.78	64.3648	164.47	27529497
3212.37	-148.78	64.3648	164.36	27529496
3216.38	-148.78	64.3648	164.36	27529496
3220.39	-148.78	64.3647	164.42	27529495
3224.4	-148.78	64.3647	164.8	27529494
3228.41	-148.78	64.3647	164.8	27529494
3232.42	-148.78	64.3646	164.87	27529493
3236.43	-148.78	64.3646	165.06	27529492
3241.17	-148.78	64.3646	165.5	27529488
3246.12	-148.78	64.3645	165.79	27529482
3249.54	-148.78	64.3645	165.95	27529452
3252.52	-148.78	64.3645	165.95	27529452
3255.51	-148.78	64.3644	166.17	27529445
3258.5	-148.78	64.3644	166.19	27529444
3261.48	-148.78	64.3644	166.19	27529444
3264.71	-148.78	64.3643	166.17	27529432
3269.42	-148.78	64.3643	166.18	27529390
3272.4	-148.78	64.3642	166.1	27529385
3276.78	-148.78	64.3642	166.14	27529377
3280.34	-148.78	64.3642	166.08	27528473
3283.32	-148.78	64.3641	166.08	27528473
3286.31	-148.78	64.3641	165.95	27528469
3291.02	-148.78	64.3641	165.91	27528457
3295.97	-148.78	64.364	165.87	27528451
3300.91	-148.78	64.364	165.8	27528388
3305.86	-148.78	64.3639	165.7	27528374
3309.08	-148.78	64.3639	165.62	27528371
3312.98	-148.78	64.3639	165.62	27528371
3317.02	-148.78	64.3638	165.61	27528358
3320.06	-148.78	64.3638	165.57	27528352
3324.07	-148.78	64.3638	165.88	27528223
3325.98	-148.78	64.3637	166.22	27528222
3328.8	-148.78	64.3637	166.22	27528222
3332.81	-148.78	64.3637	166.72	27528215
3336.82	-148.78	64.3637	167.01	27528214
3340.83	-148.78	64.3636	166.93	27528213
3345.21	-148.78	64.3636	166.93	27528213
3350.16	-148.78	64.3635	166.75	27528191
3355.11	-148.78	64.3635	166.51	27528186
3360.05	-148.78	64.3635	166.06	27528128
3365	-148.78	64.3634	165.9	27528114
3369.95	-148.78	64.3634	165.88	27528104
3374.89	-148.78	64.3633	165.96	27528070
3379.47	-148.78	64.3633	166.13	27528061
3383.48	-148.78	64.3633	166.28	27528053
3388.41	-148.78	64.3632	166.51	27528039
3393.36	-148.78	64.3632	166.76	27528030
3398.31	-148.78	64.3631	166.95	27528022
3401.33	-148.78	64.3631	166.93	27528013
3404.32	-148.78	64.3631	166.93	27528013
3407.6	-148.78	64.363	166.57	27528011
3412.55	-148.78	64.363	166.48	27528003
3417.5	-148.78	64.3629	166.47	27527991
3422.44	-148.78	64.3629	166.49	27527969
3427.39	-148.78	64.3628	166.46	27527926
3432.34	-148.78	64.3628	166.43	27527911
3436.99	-148.78	64.3628	166.46	27527889
3439.97	-148.78	64.3627	166.32	27527877
3444.41	-148.78	64.3627	166.41	27527870
3447.91	-148.78	64.3626	166.57	27527868
3451.53	-148.78	64.3626	166.57	27527868
3456.17	-148.78	64.3626	166.74	27527860
3460.18	-148.78	64.3625	166.98	27527851
3465.04	-148.78	64.3625	167.08	27527842
3469.14	-148.78	64.3625	167.1	27527840
3473.15	-148.78	64.3624	167.1	27527840
3477.08	-148.78	64.3624	167.03	27527548
3480.06	-148.78	64.3624	166.79	27527464
3483.05	-148.78	64.3623	166.79	27527464
3486.04	-148.78	64.3623	166.68	27479313
3489.02	-148.78	64.3623	166.68	27479312
3492.01	-148.78	64.3622	166.58	27479311
3494.99	-148.78	64.3622	166.58	27479311
3497.98	-148.78	64.3622	166.79	27479310
3500.97	-148.78	64.3621	166.67	27479309
3503.95	-148.78	64.3621	166.67	27479309
3506.94	-148.78	64.3621	166.45	27479308
3509.92	-148.781	64.362	166.41	27479154
3512.91	-148.781	64.362	166.25	27479153
3515.9	-148.781	64.362	166.25	27479153
3518.88	-148.781	64.3619	165.82	27479152
3521.87	-148.781	64.3619	165.14	27479151
3524.86	-148.781	64.3619	165.14	27479151
3527.84	-148.781	64.3618	164.27	27479150
3530.83	-148.781	64.3618	164.77	27479149
3533.81	-148.781	64.3618	164.77	27479149
3536.8	-148.781	64.3617	165.49	27479148
3539.79	-148.781	64.3617	166.27	27479123
3542.77	-148.781	64.3617	166.8	27479122
3545.76	-148.781	64.3616	166.8	27479122
3548.75	-148.781	64.3616	167.01	27479121
3551.73	-148.782	64.3616	167.05	27479115
3554.72	-148.782	64.3615	167.05	27479115
3558.12	-148.782	64.3615	167.07	27479107
3563.06	-148.782	64.3615	166.96	27478211
3567.6	-148.782	64.3614	166.96	27478198
3570.58	-148.782	64.3614	167.02	27478186
3575.13	-148.782	64.3614	166.92	27478178
3580.08	-148.782	64.3613	166.84	27478168
3585.03	-148.782	64.3613	166.9	27478157
3588.41	-148.782	64.3612	166.73	27478139
3592.15	-148.782	64.3612	166.73	27478139
3596.35	-148.782	64.3611	166.91	27478135
3599.33	-148.782	64.3611	166.85	27478125
3604.22	-148.782	64.3611	167.09	27478115
3607.27	-148.782	64.361	166.91	27478105
3610.25	-148.782	64.361	166.91	27478105
3613.51	-148.782	64.361	167	27478103
3618.46	-148.782	64.3609	166.97	27478097
3623.41	-148.782	64.3609	166.9	27474818
3628.35	-148.782	64.3608	166.88	27474809
3633.03	-148.782	64.3608	166.88	27474802
3636.01	-148.782	64.3608	166.59	27474794
3640.42	-148.782	64.3607	166.56	27474786
3645.37	-148.782	64.3607	166.53	27474779
3650.32	-148.782	64.3606	166.45	27474656
3655.26	-148.782	64.3606	166.34	27474646
3660.21	-148.782	64.3605	166.32	27474640
3665.16	-148.782	64.3605	166.48	27474634
3670.11	-148.782	64.3605	166.69	27474622
3675.05	-148.782	64.3604	166.8	27474607
3680	-148.782	64.3604	166.78	27474585
3684.95	-148.782	64.3603	166.7	27474522
3689.89	-148.782	64.3603	166.67	27474510
3694.84	-148.782	64.3602	166.67	27474499
3699.79	-148.782	64.3602	166.65	27474479
3704.74	-148.782	64.3601	166.65	27474445
3709.68	-148.782	64.3601	166.58	27474425
3714.63	-148.782	64.36	166.53	27474398
3719.58	-148.782	64.36	166.67	27474377
3724.53	-148.782	64.36	167.04	27474367
3728.79	-148.782	64.3599	166.81	27474359
3732.8	-148.782	64.3599	166.81	27474359
3736.81	-148.782	64.3599	166.6	27474356
3741.66	-148.782	64.3598	166.79	27474340
3746.61	-148.782	64.3598	166.94	27474324
3750.72	-148.782	64.3597	166.78	27474272
3755.18	-148.782	64.3597	166.78	27474272
3759.68	-148.782	64.3597	166.93	27474262
3763.75	-148.782	64.3596	166.77	27474257
3768.7	-148.782	64.3596	166.88	27474242
3773.58	-148.782	64.3595	167.07	27474203
3777.59	-148.782	64.3595	166.98	27474194
3781.6	-148.782	64.3595	166.98	27474194
3785.84	-148.782	64.3594	166.89	27474189
3790.78	-148.782	64.3594	166.97	27474185
3795.51	-148.782	64.3594	167.07	27474174
3799.52	-148.781	64.3593	167	27474165
3804.3	-148.781	64.3593	167.01	27474158
3808.47	-148.781	64.3593	167.07	27474132
3812.49	-148.781	64.3592	167.07	27474132
3816.5	-148.781	64.3592	167.1	27474127
3820.51	-148.781	64.3592	167.02	27474123
3825.06	-148.781	64.3591	166.91	27474102
3830.01	-148.781	64.3591	166.88	27474095
3834.96	-148.781	64.359	166.98	27474060
3839.36	-148.781	64.359	166.98	27474060
3843.53	-148.781	64.359	167	27474034
3848.47	-148.781	64.3589	166.97	27473933
3853.26	-148.781	64.3589	166.82	27473889
3857.27	-148.781	64.3588	165.51	27473841
3861.99	-148.781	64.3588	165.51	27473830
3866.23	-148.781	64.3588	164.71	27473554
3870.24	-148.781	64.3587	164.71	27473554
3874.25	-148.781	64.3587	164.49	27473546
3878.26	-148.781	64.3587	165.45	27473525
3882.27	-148.781	64.3586	165.45	27473525
3886.28	-148.78	64.3586	166.68	27473524
3890.29	-148.78	64.3586	167.1	27473523
3894.94	-148.78	64.3585	167.16	27473513
3899.89	-148.78	64.3585	167.26	27473502
3903.5	-148.78	64.3585	167.26	27473502
3907.01	-148.78	64.3584	167.31	27473500
3911.96	-148.78	64.3584	167.31	27473492
3916.91	-148.78	64.3583	167.31	27473481
3921.33	-148.78	64.3583	167.39	27473449
3924.31	-148.781	64.3583	167.57	27473442
3928.98	-148.781	64.3582	167.69	27473437
3933.92	-148.781	64.3582	167.77	27473432
3938.87	-148.781	64.3581	167.82	27473424
3943.82	-148.781	64.3581	167.87	27473413
3948.76	-148.781	64.358	167.89	27473409
3952.03	-148.781	64.358	167.87	27473403
3955.89	-148.781	64.358	167.87	27473403
3960.83	-148.781	64.3579	167.86	27473398
3965.78	-148.781	64.3579	167.81	27473388
3970.73	-148.781	64.3578	167.72	27472148
3975.67	-148.781	64.3578	167.65	27472142
3979.76	-148.781	64.3578	167.66	27472109
3982.74	-148.781	64.3577	167.44	27472101
3985.73	-148.781	64.3577	167.45	27471882
3988.72	-148.781	64.3577	167.45	27471882
3991.7	-148.781	64.3576	167.5	27471881
3994.69	-148.781	64.3576	167.37	27471880
3997.67	-148.781	64.3576	167.33	27471878
4000.66	-148.781	64.3575	167.33	27471878
4003.65	-148.781	64.3575	167.26	27471864
4006.63	-148.781	64.3575	167.23	27471829
4009.62	-148.781	64.3574	167.23	27471829
4012.6	-148.781	64.3574	167.2	27471804
4015.59	-148.782	64.3574	167.31	27471803
4018.58	-148.782	64.3573	167.38	27471802
4021.56	-148.782	64.3573	167.38	27471802
4024.55	-148.782	64.3573	167.32	27471797
4027.54	-148.782	64.3572	167.41	27471760
4030.52	-148.782	64.3572	167.41	27471760
4032.06	-148.782	64.3572	167.53	27471717
4032.57	-148.782	64.3572	167.49	27471742
4033.3	-148.782	64.3572	167.45	27471750
4034.92	-148.782	64.3571	167.87	27471698
4035.05	-148.782	64.3571	167.59	27471713
4035.65	-148.782	64.3571	167.75	27471709
4036.58	-148.782	64.3571	167.87	27471698
4039.57	-148.783	64.3571	167.69	27471687
4042.56	-148.783	64.357	167.62	27471615
4045.54	-148.783	64.357	167.81	27471606
4047.68	-148.783	64.3569	168.07	27469342
4047.82	-148.783	64.3569	168.04	27469361
4048.53	-148.783	64.357	167.81	27471606
4048.55	-148.783	64.3569	168.07	27469380
4050.67	-148.784	64.3569	168.22	27469298
4051.51	-148.783	64.3569	167.98	27471604
4052.04	-148.783	64.3569	168	27469383
4053.65	-148.784	64.3569	168.27	27469296
4054.5	-148.783	64.3569	167.68	27469386
4054.64	-148.783	64.3569	168	27469383
4055.37	-148.783	64.3569	167.85	27469384
4056.64	-148.784	64.3568	168.27	27469296
4059.63	-148.784	64.3568	168.27	27469294
4064.41	-148.784	64.3567	168.23	27469291
4069.35	-148.784	64.3567	168.21	27469287
4070.42	-148.785	64.3566	162.12	27469145
4072.63	-148.784	64.3566	163.58	27469149
4073.41	-148.785	64.3566	160.82	27468241
4074.3	-148.784	64.3567	168.25	27469255
4075.56	-148.784	64.3566	163.58	27469149
4076.29	-148.784	64.3566	164.49	27469155
4076.4	-148.785	64.3566	160.59	27468240
4077.01	-148.784	64.3566	165.76	27469162
4077.45	-148.784	64.3566	168.28	27469252
4078.82	-148.784	64.3566	167	27469179
4079.38	-148.785	64.3565	160.59	27468240
4080.44	-148.784	64.3566	168.28	27469252
4082.37	-148.785	64.3565	163.13	27468184
4082.83	-148.784	64.3566	167.78	27469204
4085.35	-148.785	64.3565	166.15	27468183
4088.34	-148.785	64.3564	166.15	27468183
4091.33	-148.785	64.3564	166.56	27468182
4094.31	-148.785	64.3564	165.98	27468181
4097.3	-148.785	64.3563	164.55	27468180
4100.28	-148.785	64.3563	164.55	27468180
4103.27	-148.785	64.3563	163.13	27468179
4106.26	-148.785	64.3562	160.97	27468178
4109.24	-148.785	64.3562	160.97	27468178
4112.23	-148.785	64.3562	160.46	27468173
4115.22	-148.786	64.3561	161.26	27468150
4119.58	-148.786	64.3561	162.83	27468129
4123.15	-148.786	64.3561	162.83	27468129
4126.14	-148.786	64.356	163.91	27468107
4129.12	-148.786	64.356	167.17	27468065
4132.11	-148.786	64.356	167.49	27468064
4135.09	-148.786	64.3559	167.49	27468064
4138.08	-148.786	64.3559	167.52	27468063
4141.07	-148.786	64.3559	167.41	27468030
4144.05	-148.786	64.3558	167.41	27468030
4147.04	-148.786	64.3558	166.91	27468029
4150.02	-148.786	64.3558	166.24	27468028
4154.58	-148.786	64.3557	166.16	27468004
4157.96	-148.786	64.3557	165.82	27467989
4161.7	-148.786	64.3557	165.82	27467989
4166.65	-148.786	64.3556	165.86	27467959
4170.84	-148.786	64.3556	166.71	27467459
4173.83	-148.786	64.3555	165.89	27467447
4176.81	-148.787	64.3555	164.75	27467443
4179.8	-148.787	64.3555	164.75	27467443
4183.07	-148.787	64.3554	164.03	27467431
4188.01	-148.787	64.3554	164.05	27467415
4192.96	-148.787	64.3554	164.28	27467394
4197.91	-148.787	64.3553	164.9	27467378
4202.86	-148.787	64.3553	165.69	27467349
4207.52	-148.787	64.3552	166.35	27467337
4210.51	-148.787	64.3552	166.18	27467322
4214.92	-148.787	64.3551	167.2	27467303
4218.44	-148.787	64.3551	167	27467089
4221.43	-148.787	64.3551	167	27467089
4224.41	-148.787	64.355	166.48	27467088
4229.17	-148.787	64.355	167.18	27467057
4232.35	-148.787	64.355	167.18	27467052
4236.29	-148.787	64.3549	167.18	27467052
4240.28	-148.787	64.3549	167.69	27467036
4243.27	-148.787	64.3549	166.98	27467033
4246.25	-148.787	64.3548	165.46	27467021
4249.24	-148.787	64.3548	165.46	27467021
4252.22	-148.787	64.3548	163.4	27467017
4255.21	-148.787	64.3547	162.5	27466987
4258.2	-148.788	64.3547	161.13	27466963
4262	-148.788	64.3547	161.13	27466963
4266.95	-148.788	64.3546	160.77	27466938
4271.08	-148.788	64.3546	160.55	27466839
4274.06	-148.788	64.3545	160.28	27466801
4277.05	-148.788	64.3545	159.68	27466800
4280.04	-148.788	64.3545	159.68	27466800
4283.36	-148.788	64.3544	157.95	27466787
4288.15	-148.788	64.3544	159.69	27466771
4292.16	-148.788	64.3544	161.13	27466763
4296.88	-148.788	64.3543	165.13	27466758
4301.83	-148.788	64.3543	166.76	27466751
4306.77	-148.788	64.3542	167.87	27466746
4311.72	-148.788	64.3542	168.38	27466745
4315.18	-148.788	64.3542	168.41	27466738
4318.16	-148.788	64.3541	168.41	27466738
4320.68	-148.788	64.3541	168.62	27461046
4321.15	-148.788	64.3541	168.5	27461056
4323.41	-148.788	64.3541	168.74	27461042
4324.48	-148.788	64.354	168.82	27461040
4325.67	-148.788	64.354	168.82	27461040
4328.66	-148.788	64.354	168.81	27461038
4331.65	-148.788	64.354	168.64	27457938
4334.63	-148.788	64.3539	168.64	27457938
4337.62	-148.789	64.3539	168.44	27457937
4340.61	-148.789	64.3539	167.24	27457936
4343.59	-148.789	64.3538	165.02	27457935
4346.58	-148.789	64.3538	165.02	27457935
4349.63	-148.789	64.3538	162.7	27457934
4354.54	-148.789	64.3537	163.29	27457863
4358.55	-148.789	64.3537	163.45	27457851
4361.93	-148.789	64.3537	163.45	27457851
4364.92	-148.789	64.3536	166.11	27457734
4367.9	-148.789	64.3536	167.2	27457733
4370.89	-148.789	64.3536	167.81	27457732
4373.88	-148.789	64.3535	167.81	27457732
4376.86	-148.789	64.3535	168.09	27457731
4379.85	-148.789	64.3535	168.51	27457730
4382.84	-148.789	64.3534	168.51	27457730
4386.08	-148.789	64.3534	168.77	27457729
4390.77	-148.789	64.3533	168.88	27457719
4393.76	-148.789	64.3533	168.88	27457715
4398.15	-148.789	64.3533	168.89	27457701
4401.69	-148.789	64.3532	168.87	27457694
4405.27	-148.79	64.3532	168.87	27457694
4410.22	-148.79	64.3532	168.87	27457678
4414.57	-148.79	64.3531	168.89	27457667
4417.56	-148.79	64.3531	168.93	27457655
4422.29	-148.79	64.353	168.94	27457638
4427.23	-148.79	64.353	168.89	27457622
4432.18	-148.79	64.3529	168.82	27457581
4437.13	-148.79	64.3529	168.83	27457266
4442.08	-148.79	64.3529	168.93	27457251
4446.19	-148.79	64.3528	168.86	27457237
4450.2	-148.789	64.3528	168.86	27457237
4454.27	-148.789	64.3528	168.74	27457232
4459.16	-148.789	64.3527	168.89	27457225
4463.17	-148.789	64.3527	168.51	27457211
4467.78	-148.789	64.3526	168.55	27457146
4472.73	-148.789	64.3526	168.69	27457139
4477.07	-148.789	64.3526	168.69	27457139
4481.08	-148.789	64.3525	168.65	27457110
4485.09	-148.789	64.3525	168.69	27457109
4489.1	-148.789	64.3525	168.76	27457099
4493.11	-148.789	64.3524	168.76	27457099
4497.12	-148.789	64.3524	168.92	27456978
4501.13	-148.789	64.3524	168.92	27456972
4505.14	-148.789	64.3524	168.92	27456972
4508.62	-148.789	64.3523	168.91	27456964
4509.88	-148.789	64.3523	168.88	27456929
4513.89	-148.788	64.3523	168.68	27456917
4517.9	-148.788	64.3523	166.91	27456916
4520.81	-148.788	64.3522	166.91	27456916
4522.63	-148.788	64.3522	166.25	27456844
4526.64	-148.788	64.3522	166.22	27456757
4530.66	-148.788	64.3522	167.38	27456756
4534.67	-148.788	64.3521	167.38	27456756
4538.68	-148.788	64.3521	168.57	27456755
4542.69	-148.788	64.3521	168.73	27456753
4547.33	-148.788	64.352	169.12	27456749
4551.64	-148.788	64.352	169.12	27456749
4555.65	-148.788	64.352	169.15	27456744
4559.66	-148.788	64.3519	169.15	27456732
4563.67	-148.788	64.3519	169.15	27456722
4567.69	-148.787	64.3519	169.15	27456722
4571.71	-148.787	64.3518	169.06	27456321
4576.64	-148.787	64.3518	168.87	27455830
4580.65	-148.787	64.3518	168.91	27455771
4584.66	-148.787	64.3517	168.91	27455771
4588.04	-148.787	64.3517	169.15	27455770
4589.4	-148.787	64.3517	169.23	27455742
4593.41	-148.787	64.3517	169.51	27455713
4597.42	-148.787	64.3517	169.62	27455711
4601.43	-148.787	64.3516	169.62	27455711
4605.44	-148.787	64.3516	169.8	27455688
4609.45	-148.787	64.3516	170.12	27455673
4611.7	-148.787	64.3515	170.36	27455657
4614.18	-148.786	64.3515	170.36	27455657
4618.19	-148.786	64.3515	170.56	27455654
4622.2	-148.786	64.3515	170.53	27455650
4623.89	-148.786	64.3515	170.37	27455628
4624.62	-148.786	64.3515	170.24	27455613
4627.66	-148.786	64.3514	170.24	27455613
4631.67	-148.786	64.3514	169.97	27455599
4635.68	-148.786	64.3514	169.73	27455598
4636.81	-148.786	64.3514	169.76	27455564
4640.42	-148.786	64.3513	169.51	27455557
4644.43	-148.786	64.3513	169.51	27455557
4648.44	-148.786	64.3513	169.44	27455371
4652.45	-148.786	64.3513	169.51	27455370
4656.46	-148.785	64.3512	169.51	27455370
4660.47	-148.785	64.3512	169.59	27455369
4664.48	-148.785	64.3512	169.5	27455368
4668.49	-148.785	64.3511	169.4	27455361
4672.5	-148.785	64.3511	169.4	27455361
4676.51	-148.785	64.3511	169.43	27455351
4680.52	-148.785	64.351	169.34	27455339
4685.06	-148.785	64.351	169.51	27455283
4689.48	-148.785	64.351	169.51	27455283
4693.49	-148.785	64.3509	169.45	27455263
4697.5	-148.785	64.3509	169.43	27455238
4701.51	-148.785	64.3509	169.48	27455099
4705.52	-148.785	64.3508	169.48	27455099
4709.53	-148.785	64.3508	169.49	27455083
4713.54	-148.784	64.3508	169.42	27455076
4718.01	-148.784	64.3507	169.42	27455076
4722.5	-148.784	64.3507	169.44	27451812
4726.58	-148.784	64.3507	169.38	27451803
4731.53	-148.784	64.3506	169.46	27451783
4736.48	-148.784	64.3506	169.59	27451773
4741.35	-148.784	64.3505	169.77	27451754
4745.36	-148.784	64.3505	169.7	27451748
4749.37	-148.784	64.3505	169.7	27451748
4753.62	-148.784	64.3504	169.56	27451732
4758.56	-148.784	64.3504	169.56	27451713
4763.51	-148.784	64.3504	169.62	27451703
4768.46	-148.784	64.3503	169.68	27451690
4773.41	-148.784	64.3503	169.64	27451681
4778.35	-148.784	64.3502	169.5	27451675
4783.3	-148.784	64.3502	169.4	27451643
4788.01	-148.784	64.3501	169.48	27451615
4792.02	-148.784	64.3501	169.53	27451611
4796.82	-148.784	64.3501	170.13	27451603
4801.76	-148.784	64.35	170.4	27451601
4805.07	-148.784	64.35	170.36	27451593
4808.89	-148.784	64.3499	170.36	27451593
4813.83	-148.784	64.3499	170.17	27451586
4818.78	-148.784	64.3499	169.88	27451567
4823.73	-148.784	64.3498	169.65	27451548
4827.85	-148.784	64.3498	169.55	27451454
4830.83	-148.784	64.3497	169.63	27451411
4833.82	-148.784	64.3497	169.7	27451410
4836.81	-148.784	64.3497	169.7	27451410
4839.79	-148.784	64.3496	169.63	27451409
4842.78	-148.784	64.3496	169.42	27451408
4847.26	-148.784	64.3496	169.47	27451393
4850.71	-148.784	64.3495	169.33	27451354
4854.39	-148.785	64.3495	169.33	27451354
4859.33	-148.785	64.3494	169.47	27451341
4864.28	-148.785	64.3494	169.69	27451332
4869.23	-148.785	64.3494	169.89	27451321
4874.18	-148.785	64.3493	169.99	27451284
4879.12	-148.785	64.3493	169.98	27451256
4883.38	-148.785	64.3492	170.18	27451242
4886.37	-148.785	64.3492	170.01	27451225
4891.19	-148.785	64.3491	170.09	27451216
4896.14	-148.785	64.3491	170.17	27451210
4901.09	-148.785	64.3491	170.18	27451197
4904.2	-148.785	64.349	170.08	27451105
4908.21	-148.785	64.349	170.03	27451096
4913.15	-148.785	64.3489	169.95	27451080
4918.1	-148.785	64.3489	169.84	27451050
4923.05	-148.785	64.3489	169.85	27451023
4926.97	-148.785	64.3488	169.85	27451023
4930.17	-148.785	64.3488	169.71	27450962
4935.02	-148.785	64.3487	169.81	27450949
4939.03	-148.785	64.3487	170.02	27450442
4943.04	-148.785	64.3487	170.02	27450442
4947.05	-148.785	64.3486	170.21	27450441
4951.06	-148.784	64.3486	170.23	27450440
4955.07	-148.784	64.3486	170.13	27450439
4959.08	-148.784	64.3486	170.13	27450439
4963.09	-148.784	64.3485	170.07	27450438
4967.1	-148.784	64.3485	170.08	27450437
4971.11	-148.784	64.3485	170.08	27450437
4975.12	-148.784	64.3484	170.11	27450436
4979.13	-148.784	64.3484	170.37	27450435
4983.14	-148.784	64.3484	170.5	27450434
4987.15	-148.784	64.3483	170.5	27450434
4991.16	-148.784	64.3483	170.37	27450432
4995.17	-148.784	64.3483	170.35	27450419
4999.18	-148.784	64.3482	170.35	27450419
5003.19	-148.784	64.3482	170.24	27450418
5007.2	-148.783	64.3482	170.23	27450417
5011.21	-148.783	64.3481	170.23	27450414
5015.22	-148.783	64.3481	170.23	27450414
5019.23	-148.783	64.3481	170.18	27450054
5023.24	-148.783	64.3481	170.21	27450053
5027.25	-148.783	64.348	170.21	27450053
5031.26	-148.783	64.348	170.19	27450051
5035.27	-148.783	64.348	170.54	27450049
5039.28	-148.783	64.3479	170.54	27450049
5042.51	-148.783	64.3479	170.42	27450045
5043.24	-148.783	64.3479	170.21	27450038
5043.96	-148.783	64.3479	169.95	27449812
5045.47	-148.782	64.3479	169.66	27449806
5049.48	-148.782	64.3479	169.25	27449785
5053.49	-148.782	64.3478	169.56	27449753
5057.5	-148.782	64.3478	169.56	27449753
5061.51	-148.782	64.3478	170.35	27449752
5062.25	-148.782	64.3478	170.61	27449745
5062.97	-148.782	64.3478	170.97	27449744
5065.99	-148.782	64.3478	170.85	27449593
5066.72	-148.781	64.3478	170.74	27449588
5066.97	-148.782	64.3478	171	27449742
5067.99	-148.781	64.3478	170.73	27449576
5068.36	-148.782	64.3478	171.1	27449665
5069.07	-148.782	64.3477	171.1	27449679
5069.79	-148.782	64.3477	171.1	27449665
5072	-148.781	64.3478	170.59	27449510
5073.54	-148.781	64.3478	170.95	27449508
5076.73	-148.781	64.3477	171	27449490
5080.75	-148.781	64.3477	171	27449490
5084.76	-148.781	64.3477	170.99	27449485
5088.77	-148.781	64.3476	170.96	27449467
5093.25	-148.781	64.3476	171.11	27449461
5096.05	-148.781	64.3476	171.17	27449458
5098.45	-148.781	64.3476	171.17	27449458
5102.46	-148.781	64.3475	171.16	27449456
5106.47	-148.78	64.3475	171.03	27449025
5110.48	-148.78	64.3475	171.03	27449025
5114.49	-148.78	64.3474	170.77	27449024
5118.5	-148.78	64.3474	170.54	27449022
5122.51	-148.78	64.3474	170.38	27449015
5126.93	-148.78	64.3473	170.38	27449015
5131.47	-148.78	64.3473	170.49	27449003
5135.5	-148.78	64.3473	170.49	27448976
5140.42	-148.78	64.3472	170.61	27448958
5144.44	-148.78	64.3472	170.59	27448944
5148.45	-148.78	64.3472	170.59	27448944
5152.46	-148.78	64.3471	170.58	27448884
5156.47	-148.78	64.3471	170.72	27448883
5160.48	-148.78	64.3471	170.96	27448882
5164.49	-148.78	64.347	170.96	27448882
5168.5	-148.78	64.347	170.92	27448881
5172.51	-148.779	64.347	170.81	27448872
5176.52	-148.779	64.3469	170.81	27448872
5180.53	-148.779	64.3469	170.78	27448862
5184.54	-148.779	64.3469	170.78	27448853
5188.55	-148.779	64.3469	170.79	27448827
5191.58	-148.779	64.3468	170.79	27448827
5192.31	-148.779	64.3468	170.87	27448822
5194.01	-148.779	64.3468	171	27448816
5198.02	-148.779	64.3468	170.94	27448807
5202.03	-148.779	64.3468	171.15	27448384
5206.48	-148.779	64.3467	171.15	27448384
5210.99	-148.779	64.3467	171.28	27448345
5215.05	-148.779	64.3467	171.41	27448342
5219.89	-148.779	64.3466	171.44	27448340
5222.87	-148.779	64.3466	171.47	27448337
5226.52	-148.779	64.3465	171.47	27448337
5230.74	-148.779	64.3465	171.1	27448281
5235.68	-148.779	64.3465	170.88	27448256
5240.63	-148.779	64.3464	170.79	27447709
5245.58	-148.779	64.3464	170.77	27447686
5250.32	-148.779	64.3463	170.72	27447667
5253.82	-148.774	64.3466	171.33	27445539
5254.32	-148.774	64.3466	171.43	27445534
5254.33	-148.778	64.3463	170.6	27446690
5255.05	-148.774	64.3466	171.58	27445528
5255.77	-148.774	64.3466	171.66	27445506
5256.5	-148.774	64.3466	171.63	27445309
5256.8	-148.774	64.3466	171.5	27445547
5258.34	-148.778	64.3463	170.72	27446689
5259.79	-148.775	64.3466	171.5	27445547
5260.31	-148.774	64.3466	171.48	27445153
5262.35	-148.778	64.3462	170.72	27446689
5262.59	-148.774	64.3466	171.32	27445143
5262.77	-148.775	64.3465	171.49	27445553
5263.31	-148.774	64.3466	171.33	27445130
5264.04	-148.774	64.3466	171.47	27445105
5264.76	-148.774	64.3466	171.58	27445098
5265.49	-148.773	64.3466	171.57	27445067
5265.76	-148.775	64.3465	171.56	27445557
5266.21	-148.773	64.3466	171.63	27445037
5266.36	-148.778	64.3462	170.96	27446688
5266.94	-148.773	64.3466	171.77	27445032
5267.66	-148.773	64.3466	171.88	27445020
5268.75	-148.775	64.3465	171.71	27445559
5270.12	-148.773	64.3466	171.88	27445020
5270.24	-148.775	64.3464	171.71	27445559
5270.37	-148.778	64.3462	171.02	27446687
5271.01	-148.775	64.3464	171.83	27445681
5273.76	-148.773	64.3465	171.72	27444998
5273.99	-148.775	64.3464	171.94	27445683
5274.38	-148.778	64.3462	171.02	27446687
5274.85	-148.773	64.3465	171.74	27444987
5277.88	-148.778	64.3461	170.93	27446680
5278.6	-148.778	64.3461	170.88	27446674
5278.86	-148.773	64.3465	171.75	27444959
5278.92	-148.775	64.3463	171.79	27445968
5279.33	-148.778	64.3461	170.82	27446662
5280.05	-148.778	64.3461	170.8	27446617
5281.28	-148.778	64.3461	170.92	27446609
5281.93	-148.775	64.3463	171.67	27446015
5282.87	-148.773	64.3465	171.75	27444959
5283.42	-148.777	64.3461	171.38	27446499
5284.12	-148.777	64.3461	171.38	27446499
5284.91	-148.775	64.3463	171.67	27446015
5285.29	-148.778	64.3461	171.17	27446597
5286.88	-148.773	64.3465	171.77	27444558
5287.43	-148.777	64.3461	171.39	27446497
5287.9	-148.775	64.3462	171.59	27446019
5288.27	-148.777	64.3461	171.45	27446396
5288.44	-148.777	64.3461	171.28	27446482
5288.99	-148.776	64.3461	171.46	27446371
5289.17	-148.777	64.3461	171.09	27446469
5289.4	-148.777	64.3461	171.45	27446396
5289.89	-148.777	64.3461	170.92	27446456
5290.62	-148.777	64.3461	170.92	27446453
5290.89	-148.775	64.3462	171.64	27446037
5290.89	-148.773	64.3464	171.9	27444557
5291.11	-148.775	64.3462	171.7	27446058
5291.34	-148.777	64.3461	171.09	27446404
5291.35	-148.776	64.3461	171.41	27446276
5292.06	-148.777	64.3461	171.34	27446398
5293.15	-148.775	64.3462	171.7	27446061
5294.18	-148.776	64.3462	171.58	27446064
5294.69	-148.776	64.3461	171.46	27446079
5294.9	-148.772	64.3464	171.94	27444555
5294.91	-148.776	64.3462	171.7	27446061
5295.09	-148.776	64.3461	171.46	27446274
5295.81	-148.776	64.3461	171.36	27446260
5296.53	-148.776	64.3461	171.34	27446248
5297.26	-148.776	64.3461	171.34	27446232
5297.41	-148.772	64.3464	171.94	27444555
5297.67	-148.776	64.3461	171.37	27446104
5298.14	-148.772	64.3464	172	27444529
5298.86	-148.772	64.3464	172.07	27444517
5301.09	-148.772	64.3464	172.15	27444514
5304.96	-148.772	64.3463	172.2	27444510
5305.82	-148.772	64.3463	172.2	27444508
5309.83	-148.772	64.3463	172.22	27444148
5314.43	-148.772	64.3463	172.26	27444136
5319.38	-148.772	64.3462	172.3	27444132
5323.74	-148.772	64.3462	172.3	27444132
5327.75	-148.772	64.3462	172.29	27444130
5331.76	-148.772	64.3461	172.26	27444095
5335.77	-148.772	64.3461	172.34	27444070
5340.14	-148.771	64.3461	172.34	27444070
5344.72	-148.771	64.346	172.5	27444059
5348.73	-148.771	64.346	172.37	27444054
5349.55	-148.771	64.346	172.37	27442954
5353.47	-148.771	64.346	172.25	27442942
5357.48	-148.771	64.3459	172.25	27442942
5361.02	-148.771	64.3459	172.11	27442914
5361.75	-148.771	64.3459	172.13	27442904
5362.94	-148.771	64.3459	172.22	27442857
5366.95	-148.771	64.3459	172.2	27442846
5368.57	-148.771	64.3459	172.18	27442830
5369.29	-148.771	64.3459	172.18	27442805
5372.41	-148.77	64.3458	172.21	27442803
5376.42	-148.77	64.3458	172.21	27442803
5380.43	-148.77	64.3458	172.11	27442790
5381.48	-148.77	64.3458	172.2	27442569
5382.21	-148.77	64.3458	172.31	27442545
5385.89	-148.77	64.3457	172.43	27442544
5389.9	-148.77	64.3457	172.43	27442544
5393.91	-148.77	64.3457	172.44	27442540
5397.92	-148.77	64.3457	172.21	27442537
5399.77	-148.77	64.3456	172.12	27442525
5400.49	-148.77	64.3456	172.09	27442511
5403.38	-148.77	64.3456	172.09	27442511
5406.59	-148.769	64.3456	172.09	27442502
5407.31	-148.769	64.3456	172.09	27442495
5408.04	-148.769	64.3456	172.11	27442483
5409.56	-148.769	64.3456	172.16	27442400
5413.57	-148.769	64.3456	172.39	27442357
5414.86	-148.769	64.3456	172.55	27442352
5415.58	-148.769	64.3456	172.71	27442346
5416.3	-148.769	64.3456	172.78	27442339
5417.88	-148.769	64.3456	172.68	27442271
5419.75	-148.769	64.3455	172.78	27442325
5420.86	-148.769	64.3455	172.78	27442325
5421.89	-148.768	64.3455	172.57	27442262
5423.97	-148.768	64.3455	172.59	27442241
5424.7	-148.768	64.3455	172.61	27442236
5427.35	-148.768	64.3455	172.61	27442236
5431.36	-148.768	64.3455	172.42	27442211
5435.37	-148.768	64.3454	172.42	27441581
5439.38	-148.768	64.3454	172.42	27441580
5443.39	-148.768	64.3454	172.42	27441580
5447.4	-148.768	64.3454	172.3	27441579
5452.28	-148.768	64.3453	172.32	27441567
5457.23	-148.768	64.3453	172.36	27441557
5461.3	-148.768	64.3452	172.31	27441550
5464.79	-148.768	64.3452	172.31	27441550
5467.97	-148.768	64.3452	172.32	27441542
5472.72	-148.768	64.3451	172.48	27441265
5475.71	-148.768	64.3451	172.69	27441260
5480.04	-148.768	64.3451	172.79	27441237
5484.99	-148.768	64.345	172.88	27441233
5489.93	-148.768	64.345	172.89	27441232
5494.24	-148.768	64.3449	172.89	27441232
5497.97	-148.768	64.3449	172.86	27441222
5500.96	-148.768	64.3449	172.78	27441209
5505.62	-148.768	64.3448	172.81	27441137
5508.89	-148.768	64.3448	172.89	27441135
5512.75	-148.768	64.3447	172.89	27441135
5517.69	-148.768	64.3447	172.92	27441128
5521.77	-148.768	64.3447	172.85	27441109
5524.76	-148.768	64.3446	172.81	27440570
5527.74	-148.768	64.3446	173.07	27440563
5530.73	-148.768	64.3446	173.07	27440563
5533.71	-148.768	64.3445	173.12	27440559
5536.7	-148.768	64.3445	173.05	27440541
5539.69	-148.768	64.3445	173.01	27440514
5542.67	-148.769	64.3444	173.01	27440514
5545.09	-148.769	64.3444	173.2	27440476
5545.66	-148.769	64.3444	173.11	27440496
5547.92	-148.769	64.3444	173.17	27440470
5550.91	-148.769	64.3443	173.17	27440470
5554.15	-148.769	64.3443	173	27440307
5558.84	-148.769	64.3443	173.13	27440291
5561.83	-148.769	64.3442	173	27440282
5564.81	-148.769	64.3442	172.93	27435482
5567.8	-148.769	64.3442	172.93	27435482
5570.79	-148.769	64.3441	173.18	27435481
5573.77	-148.769	64.3441	173.33	27435473
5576.76	-148.769	64.3441	173.33	27435473
5576.85	-148.77	64.344	173.08	27435377
5577.35	-148.77	64.344	172.91	27435387
5578.08	-148.77	64.344	172.93	27435419
5578.8	-148.769	64.344	172.91	27435435
5579.52	-148.769	64.344	173.1	27435466
5579.7	-148.77	64.344	172.96	27435331
5579.83	-148.77	64.344	172.92	27435374
5580.43	-148.77	64.344	172.93	27435342
5581.37	-148.77	64.344	172.96	27435331
5581.9	-148.775	64.3436	173.73	27433995
5582.62	-148.775	64.3436	173.68	27434000
5582.78	-148.775	64.3436	173.84	27433654
5582.87	-148.775	64.3436	173.69	27433584
5583.5	-148.77	64.3439	172.84	27435256
5583.52	-148.775	64.3436	173.67	27433600
5583.63	-148.77	64.3439	172.96	27435239
5584.25	-148.775	64.3436	173.67	27433611
5584.97	-148.775	64.3436	173.7	27433625
5585.13	-148.771	64.3439	173.17	27435028
5585.21	-148.774	64.3436	173.68	27434000
5585.7	-148.775	64.3436	173.77	27433636
5585.85	-148.771	64.3439	173.01	27435055
5585.85	-148.775	64.3435	173.71	27433582
5586.58	-148.77	64.3439	173	27435230
5586.62	-148.77	64.3439	172.89	27435235
5587.43	-148.771	64.3439	173.25	27435013
5588.72	-148.774	64.3436	173.76	27434012
5588.84	-148.775	64.3435	173.71	27433582
5588.93	-148.776	64.3435	173.71	27433509
5588.95	-148.776	64.3435	173.69	27433526
5589.44	-148.774	64.3436	173.87	27434042
5589.67	-148.776	64.3435	173.74	27433547
5590.17	-148.774	64.3436	173.87	27434047
5590.4	-148.776	64.3435	173.72	27433561
5590.42	-148.771	64.3438	173.25	27435013
5590.89	-148.774	64.3436	173.77	27434059
5591.12	-148.775	64.3435	173.7	27433563
5591.62	-148.774	64.3436	173.64	27434073
5591.91	-148.776	64.3434	173.62	27433500
5592.34	-148.774	64.3436	173.51	27434091
5593.06	-148.774	64.3436	173.43	27434097
5593.41	-148.771	64.3438	173.23	27435001
5594.29	-148.774	64.3436	173.44	27434105
5594.9	-148.776	64.3434	173.57	27433493
5596.39	-148.771	64.3438	173.21	27434956
5596.55	-148.776	64.3434	173.57	27433493
5597.16	-148.776	64.3434	173.7	27433488
5598.26	-148.773	64.3436	173.48	27434485
5598.3	-148.774	64.3435	173.53	27434117
5598.98	-148.773	64.3436	173.36	27434489
5599.38	-148.771	64.3437	173.21	27434956
5599.65	-148.772	64.3436	173.29	27434710
5599.71	-148.773	64.3436	173.21	27434501
5599.88	-148.774	64.3435	173.54	27434129
5600.04	-148.773	64.3436	173.48	27434485
5600.15	-148.776	64.3433	173.83	27433482
5600.38	-148.772	64.3436	173.24	27434727
5600.43	-148.773	64.3436	173.23	27434507
5600.52	-148.777	64.3433	173.7	27432069
5600.61	-148.773	64.3435	173.49	27434147
5601.14	-148.778	64.3432	173.7	27431939
5601.15	-148.773	64.3436	173.39	27434530
5601.25	-148.777	64.3433	173.75	27432089
5601.33	-148.773	64.3435	173.44	27434157
5601.37	-148.772	64.3436	173.33	27434732
5601.43	-148.778	64.3432	173.73	27431956
5601.64	-148.771	64.3437	173.33	27434939
5601.77	-148.771	64.3437	173.26	27434951
5601.78	-148.777	64.3433	173.7	27432069
5601.97	-148.777	64.3433	173.75	27432095
5602.06	-148.773	64.3435	173.47	27434478
5602.15	-148.777	64.3432	173.71	27431962
5602.33	-148.772	64.3436	173.25	27434690
5602.7	-148.777	64.3433	173.71	27433402
5602.88	-148.777	64.3432	173.7	27432020
5602.95	-148.773	64.3436	173.48	27434646
5603.13	-148.776	64.3433	173.85	27433477
5603.42	-148.777	64.3433	173.7	27433431
5603.45	-148.772	64.3436	173.33	27434683
5603.6	-148.777	64.3432	173.66	27432043
5604.12	-148.772	64.3436	173.17	27434896
5604.13	-148.778	64.3432	173.68	27431850
5604.15	-148.776	64.3433	173.75	27433462
5604.32	-148.777	64.3432	173.6	27432054
5604.59	-148.772	64.3436	173.33	27434683
5604.63	-148.771	64.3437	173.22	27434930
5604.85	-148.771	64.3436	173.18	27434927
5605.38	-148.772	64.3436	173.36	27434850
5606.16	-148.772	64.3436	173.15	27434876
5606.96	-148.772	64.3436	173.45	27434658
5607.11	-148.778	64.3431	173.68	27431850
5607.2	-148.772	64.3436	173.17	27434861
5607.92	-148.772	64.3436	173.15	27434876
5610.1	-148.778	64.3431	173.66	27431849
5613.09	-148.778	64.3431	173.6	27431848
5617.79	-148.778	64.343	173.71	27431842
5621.02	-148.778	64.343	173.74	27431836
5624.91	-148.778	64.343	173.74	27431836
5629.86	-148.778	64.3429	173.72	27431796
5633.9	-148.778	64.3429	173.65	27431787
5636.89	-148.778	64.3428	173.62	27431730
5639.87	-148.778	64.3428	173.64	27431729
5642.86	-148.778	64.3428	173.64	27431729
5645.84	-148.778	64.3428	173.7	27431728
5648.83	-148.778	64.3427	173.86	27431727
5651.82	-148.778	64.3427	173.89	27431697
5655.57	-148.779	64.3426	173.89	27431697
5660.52	-148.779	64.3426	173.85	27431687
5665.46	-148.778	64.3426	173.74	27431637
5670.41	-148.778	64.3425	173.65	27431611
5675.36	-148.778	64.3425	173.68	27431586
5680.3	-148.778	64.3424	173.81	27431583
5685.25	-148.778	64.3424	173.88	27431569
5690.2	-148.778	64.3423	173.82	27431559
5695.15	-148.778	64.3423	173.7	27431539
5700.09	-148.778	64.3422	173.66	27431524
5704.28	-148.779	64.3422	173.76	27431510
5707.26	-148.779	64.3422	173.88	27431497
5710.25	-148.779	64.3421	173.77	27431494
5714.34	-148.779	64.3421	173.72	27431484
5718.76	-148.779	64.3421	173.72	27431484
5722.28	-148.779	64.342	173.77	27431443
5723.63	-148.778	64.342	173.91	27431438
5728.44	-148.778	64.342	174	27431362
5732.45	-148.778	64.342	174.07	27431361
5737.15	-148.778	64.3419	174.12	27431356
5740.66	-148.778	64.3419	174.19	27431348
5744.27	-148.778	64.3418	174.19	27431348
5748.59	-148.778	64.3418	174.19	27431321
5751.58	-148.779	64.3418	174.13	27431302
5756.34	-148.779	64.3417	174.12	27431294
5761.28	-148.779	64.3417	174.09	27431286
5766.23	-148.779	64.3416	174.07	27431269
5771.18	-148.779	64.3416	174.08	27431256
[truncated: 16,271 more rows]

## Sheet: IRSL_AgeData
Samples processed and dated at the Utah State University Luminescence Lab (https://www.usu.edu/geo/osl/)
Sample	USU_num	numAliquots_calc*	numAliquots_analyzed*	DoseRate_Gy_kyr	DoseRate_2sigma_Gy_kyr	FadingRate_prct_decade	FadingRate_2sigma_prct_decade	EquivalentDose_Gy	EquivalentDose_2sigma_Gy	IRSLage_kyr**	IRSLage_1sigma_kyr**	ageMdl***
20ABA014-4	USU-3496	16	18	5.42	0.23	5.7	0.7	198.12	20.29	65.8	6.37	CAM
20ABA015-2	USU-3497	13	15	6.01	0.27	2.3	0.5	36.14	2.93	7.32	0.68	CAM
20ABA016	USU-3498	13	23	5.68	0.23	5	1	12.02	3.76	4.36	0.79	MAM
20ABA017	USU-3499	12	14	5.54	0.25	3.8	0.2	38.2	2.51	9.76	0.87	CAM
21TOT11	USU-3734	17	21	4.44	0.19	3.6	0.5	19.47	3.93	6	0.78	CAM
21TOT18	USU-3735	15	19	1.91	0.08	4.8	0.5	5.27	0.71	4.23	0.45	CAM
21TOT19	USU-3736	13	22	5.75	0.25	4.3	0.7	147	35.42	38.29	5.6	CAM
*Age analysis using the single-aliquot regenerative-dose procedure of Wallinga et al. (2000) on 1-mm small-aliquots of feldspar sand at 50°C IRSL. Number of aliquots used in age calculation (numAliquots_calc) and number of aliquots analyzed (numAliquots_analyzed)
**IRSL age on each aliquot corrected for fading following the method by Auclair et al. (2003) and correction model of Huntley and Lamothe (2001).
***Equivalent dose and IRSL age calculated using the Central Age Model (CAM) or Minimum Age Model (MAM) of Galbraith & Roberts (2012) as noted.
Reference	Citation
Auclair et al (2003)	Auclair, M., Lamothe, M., Huot, S., 2003. Measurement of anomalous fading for feldspar IRSL using SAR. Radiation Measurements 37, 487-492.
Galbraith & Roberts (2012)	Galbraith, R.F., and Roberts, R.G., 2012. Statistical aspects of equivalent dose and error calculation and display in OSL dating: An Overview and some recommendations. Quaternary Geochronology 11, 1-27.
Huntley & Lamothe (2001)	Huntley, D.J., Lamothe, M., 2001. Ubiquity of anomalous fading in K-feldspars and the measurement and correction for it in optical dating. Can. J. Earth Sci. 38, 1093–1106
Wallinga et al (2000)	Wallinga, J., Murray, A., Wintle, A., 2000. The single-aliquot regenerative-dose (SAR) protocol applied to coarse-grain feldspar. Radiation Measurements 32, 529-533.

## Sheet: IRSL_DoseRateData
Samples processed and dated at the Utah State University Luminescence Lab (https://www.usu.edu/geo/osl/)
Sample	USU_num	depth_m	water_prct*	grainSz_min_um	grainSz_max_um	cosmicDoseRate_Gy_kyr	cosmicDoseRate_2sigma_Gy_kyr	Subsample_grainSz**	Subsample_grainSz_prct	K_prct	K_2sigma_prct	Rb_ppm	Rb_2sigma_ppm	Th_ppm	Th_2sigma_ppm	U_ppm	U_2sigma_ppm
20ABA014-4	USU-3496	0.6	4.8	150	250	0.21	0.02	F	75	2.13	0.05	95	3.8	12	1.1	2.4	0.2
20ABA014-4	USU-3496	0.6	4.8	150	250	0.21	0.02	M	12.5	2.59	0.06	113.5	4.5	11.4	1	2.1	0.1
20ABA014-4	USU-3496	0.6	4.8	150	250	0.21	0.02	C	12.5	4.35	0.11	189.5	7.6	18.1	1.6	2.2	0.2
20ABA015-2	USU-3497	1.75	3	150	250	0.18	0.02	F	100	2.3	0.06	102.5	4.1	14.5	1.3	3	0.2
20ABA016	USU-3498	0.75	4.3	150	250	0.21	0.02	F	85	2.68	0.07	110.5	4.4	11.4	1	2.1	0.1
20ABA017	USU-3499	0.75	4.3	150	250	0.21	0.02	M	15	3.97	0.1	160.5	6.4	14.3	1.3	2.4	0.2
20ABA017	USU-3499	0.35	11.2	90	150	0.22	0.2	F	70	2.27	0.06	129	5.2	14.9	1.3	2.7	0.2
20ABA017	USU-3499	0.35	11.2	90	150	0.22	0.2	M	15	1.72	0.04	83.7	3.3	10.7	1	2.5	0.2
20ABA017	USU-3499	0.35	11.2	90	150	0.22	0.2	C	15	4.7	0.12	138	5.5	10.2	0.9	1.8	0.1
21TOT11	USU-3734	0.85	10.1	75	150	0.21	0.02	F	90	1.81	0.05	82.9	3.3	9.8	0.9	2.3	0.2
21TOT11	USU-3734	0.85	10.1	75	150	0.21	0.02	M	10	2.66	0.07	127	5.1	12.9	1.2	2.6	0.2
21TOT18	USU-3735	0.9	6.3	75	150	0.21	0.02	F	99	0.86	0.02	28.3	1.1	2.1	0.2	0.5	0.1
21TOT18	USU-3735	0.9	6.3	75	150	0.21	0.02	M	1	1.38	0.03	46.5	1.9	3.9	0.4	1	0.2
21TOT19	USU-3736	0.95	2.3	75	150	0.21	0.02	F	75	2.48	0.06	99.8	4	11.3	1	3.5	0.2
21TOT19	USU-3736	0.95	2.3	75	150	0.21	0.02	M	15	1.79	0.04	67.8	2.7	8	0.7	2.1	0.1
21TOT19	USU-3736	0.95	2.3	75	150	0.21	0.02	C	10	0.78	0.02	31.5	1.3	3.7	0.3	0.7	0.1
*Assumed 6.0 ± 3.0% for moisture content over burial history for samples with <6% in-situ moisture content.
**Dose rate subsamples based on grain size: fine-F (<1.7 mm), medium-M (1.7-16 mm), coarse-C (>16 mm), and weighted proportions (%) of subsamples used with chemistry in gamma dose rate calculation. Beta dose rate uses chemistry from fine fraction (<1.7 mm) only.
Radioelemental concentrations determined using ICP-MS and ICP-AES techniques; dose rate is derived from concentrations by conversion factors from Guérin et al. (2011). Grain-size based internal beta dose rate determined assuming 12.5% K and 400ppm Rb using Mejdahl (1979). Alpha contribution to dose rate determined using an efficiency factor, or ‘a-value’, of 0.09±0.01 after Reese-Jones (1995).
Reference	Citation
Guérin et al. (2011)	Guérin, G., Mercier, N., Adamiec, G., 2011. Dose-rate conversion factors: update: Ancient TL 29, 5-8.
Mejdahl (1979)	Mejdahl, V., 1979. Thermoluminescence dating: Beta-dose attenuation in quartz grains. Archaeometry 21, 61-72.
Reese-Jones (1995)	Rees-Jones, J., 1995. Optical dating of young sediments using fine-grain quartz: Ancient TL v. 13, 9-14.

## Sheet: IRSL_SiteAgeRateData
sample	lat	long	ifsarEl_m	sampleDepth_m	fieldHt_tread_m	fieldHt_strath_m	age_ka	age_1s_ka	irate	irate_1s	profileDist_km
20ABA015-2	64.2058	-148.766	309.76	1.75	40	35	7.32	0.68	4.78	0.81	20.8
20ABA017	64.1868	-148.744	356.15	0.35	60	55	9.76	0.87	5.64	0.72	23.1
20ABA016	64.1625	-148.685	391.25	0.75	4	0.001	4.36	0.79	0	1.15	26.2
20ABA014-4	64.1597	-148.692	455.99	0.6	75	70	65.8	6.37	1.13931	0.13	26.5
21TOT19	64.1155	-148.542	523.09	0.95	20.4	16	38.29	5.6	0.42	0.14	32.6
21TOT11	64.1001	-148.505	544.95	0.85	7	4	6	0.78	0.67	0.84	34.6
21TOT18	64.0847	-148.504	567.02	0.9	21.5	14	4.23	0.45	--	--		anomalously young age omitted from interpretation, attributed to post-depositional root bioturbation

## Sheet: tiltProfiles
	starting coordinate	ending coordinate	definition
nenanaX	64.218453, -148.812534	64.205936, -148.800852	Distance in meters along elevation profile of north-tilted Nenana Gravel west of Totatlanika River on the northern Alaska Range front.
nenanaY	64.218453, -148.812535	64.205936, -148.800853	Elevation in meters extracted from the Alaska IfSAR DEM (search https://earthexplorer.usgs.gov/) along elevation profile of north-tilted Nenana Gravel west of Totatlanika River on the northern Alaska Range front.
terraceX	64.221292, -148.778889	64.204956, -148.764804	Distance in meters along elevation profile of north-tilted ~7 ka terrace on the Totatlanika River at the northern Alaska Range front.
terraceY	64.221292, -148.778890	64.204956, -148.764805	Elevation in meters extracted from the Alaska IfSAR DEM (search https://earthexplorer.usgs.gov/) along elevation profile of north-tilted ~7 ka terrace on the Totatlanika River at the northern Alaska Range front.
nenanaX	nenanaY	terraceX	terraceY									slope (degrees)
0	255.931	0	263.699								Nenana	27.0216
9.93159	256.634	9.96428	263.697								Terrace 7 ka	4.00417
19.8632	258.115	19.9286	263.792
29.7948	260.209	29.8928	263.855
39.7264	261.648	39.8571	263.751
49.658	262.645	49.8214	263.721
59.5895	263.601	59.7857	263.699
69.5211	264.517	69.7499	263.593
79.4527	265.183	79.7142	263.698
89.3843	265.309	89.6785	263.836
99.3159	265.343	99.6428	263.94
109.247	265.416	109.607	264.046
119.179	265.568	119.571	264.309
129.111	265.602	129.536	264.549
139.042	265.414	139.5	264.577
148.974	264.914	149.464	264.577
158.905	264.067	159.428	264.605
168.837	263.447	169.393	264.634
178.769	263.641	179.357	264.728
188.7	263.796	189.321	264.705
198.632	263.692	199.285	264.496
208.563	263.719	209.25	264.337
218.495	264.582	219.214	264.497
228.426	265.838	229.178	264.899
238.358	266.915	239.142	265.316
248.29	267.604	249.107	265.65
258.221	267.888	259.071	265.86
268.153	268.221	269.035	266.029
278.084	268.888	278.999	265.972
288.016	269.722	288.964	265.93
297.947	270.512	298.928	266.124
307.879	271.46	308.892	266.319
317.811	272.321	318.856	266.353
327.742	272.852	328.821	266.505
337.674	273.182	338.785	266.695
347.605	273.61	348.749	266.618
357.537	274.051	358.713	266.649
367.468	274.335	368.678	266.663
377.4	274.778	378.642	266.467
387.331	275.171	388.606	266.387
397.263	275.691	398.57	266.625
407.195	276.299	408.535	266.588
417.126	276.866	418.499	266.574
427.058	277.196	428.463	266.679
436.989	277.297	438.427	266.874
446.921	277.572	448.392	266.932
456.852	277.89	458.356	266.862
466.784	278.056	468.32	266.997
476.715	278.531	478.284	267.288
486.647	279.223	488.249	267.589
496.579	279.892	498.213	267.638
506.51	280.445	508.177	267.626
516.442	280.977	518.141	267.816
526.373	281.529	528.106	267.969
536.305	282.109	538.07	268.042
546.236	282.832	548.034	268.184
556.168	283.695	557.998	268.317
566.099	284.38	567.962	268.3
576.031	285.112	577.927	268.301
585.962	286.048	587.891	268.478
595.894	286.959	597.855	268.486
605.826	287.681	607.819	268.541
615.757	288.412	617.784	268.671
625.689	288.928	627.748	268.939
635.62	289.56	637.712	269.372
645.552	290.206	647.676	269.469
655.483	290.812	657.64	269.4
665.415	291.368	667.605	269.523
675.346	292.117	677.569	269.661
685.278	293.012	687.533	269.928
695.209	294.097	697.497	270.286
705.141	295.2	707.461	270.252
715.072	296.1	717.426	269.935
725.004	297.177	727.39	269.595
734.935	298.067	737.354	269.483
744.867	298.863	747.318	269.69
754.798	299.083	757.283	269.901
764.73	299.156	767.247	269.858
774.662	299.527	777.211	269.704
784.593	300.225	787.175	269.555
794.525	300.941	797.139	269.405
804.456	301.705	807.104	269.454
814.388	302.924	817.068	269.861
824.319	304.556	827.032	270.45
834.251	306.129	836.996	270.937
844.182	307.987	846.96	271.156
854.114	309.604	856.925	271.303
864.045	311.083	866.889	271.378
873.977	312.731	876.853	271.377
883.908	314.318	886.817	271.182
893.84	315.828	896.781	270.851
903.771	317.278	906.745	270.735
913.703	318.862	916.71	270.853
923.634	320.863	926.674	270.964
933.566	322.92	936.638	271.286
943.497	324.735	946.602	271.507
953.429	326.982	956.566	271.87
963.36	329.925	966.531	272.373
973.292	332.884	976.495	272.703
983.223	335.498	986.459	272.95
993.155	338.527	996.423	272.988
1003.09	341.982	1006.39	273.149
1013.02	345.857	1016.35	273.456
1022.95	349.675	1026.32	273.582
1032.88	353.654	1036.28	273.527
1042.81	357.861	1046.24	273.532
1052.74	361.98	1056.21	273.642
1062.68	365.895	1066.17	273.947
1072.61	369.901	1076.14	274.209
1082.54	375.081	1086.1	274.264
1092.47	379.305	1096.06	274.359
1102.4	382.237	1106.03	274.563
1112.33	386.441	1115.99	274.573
1122.26	391.206	1125.96	274.789
1132.2	396.339	1135.92	274.896
1142.13	401.281	1145.89	274.634
1152.06	405.373	1155.85	274.623
1161.99	409.058	1165.81	275.052
1171.92	413.255	1175.78	275.426
1181.85	418.021	1185.74	275.717
1191.78	423.101	1195.71	275.781
1201.72	428.892	1205.67	275.658
1211.65	435.515	1215.63	275.75
1221.58	442.196	1225.6	275.993
1231.51	448.564	1235.56	276.183
1241.44	454.826	1245.53	276.249
1251.37	460.855	1255.49	276.291
1261.31	467.127	1265.46	275.745
1271.24	472.996	1275.42	275.454
1281.17	479.1	1285.38	275.843
1291.1	484.514	1295.35	276.427
1301.03	489.909	1305.31	277.107
1310.96	495.026	1315.28	277.763
1320.89	500.109	1325.24	278.26
1330.83	505.391	1335.2	278.437
1340.76	510.217	1345.17	278.682
1350.69	515.539	1355.13	279.063
1360.62	520.087	1365.1	279.41
1370.55	521.644	1375.06	279.776
1380.48	519.797	1385.03	279.971
1390.41	516.153	1394.99	279.9
1400.35	511.501	1404.95	279.673
1410.28	507.041	1414.92	279.423
1420.21	502.745	1424.88	279.53
1430.14	498.7	1434.85	279.935
1440.07	494.75	1444.81	280.466
1450	490.663	1454.77	281.126
1459.93	487.919	1464.74	281.73
1469.87	486.914	1474.7	282.329
1479.8	487.113	1484.67	282.902
1489.73	487.533	1494.63	283.298
1499.66	488.277	1504.6	283.727
		1514.56	284.587
		1524.52	285.979
		1534.49	287.761
		1544.45	289.558
		1554.42	291.034
		1564.38	291.983
		1574.34	292.697
		1584.31	293.386
		1594.27	294.096
		1604.24	294.825
		1614.2	295.661
		1624.16	296.549
		1634.13	297.397
		1644.09	298.308
		1654.06	299.244
		1664.02	300.341
		1673.99	301.486
		1683.95	302.327
		1693.91	302.26
		1703.88	302.521
		1713.84	303.304
		1723.81	303.865
		1733.77	304.1
		1743.73	304.366
		1753.7	304.826
		1763.66	305.476
		1773.63	306.193
		1783.59	306.678
		1793.55	306.72
		1803.52	307.094
		1813.48	308.017
		1823.45	308.906
		1833.41	309.671
		1843.38	309.736
		1853.34	308.726
		1863.3	306.59
		1873.27	302.711
		1883.23	298.076
		1893.2	292.692
		1903.16	288.495
		1913.12	285.859
		1923.09	283.076
		1933.05	281.077
		1943.02	279.78
		1952.98	278.826

[truncated: 1 more sheets: NFt_HardyPoblet2005]
